# Supplementary material
Source: PubMed Central journal article supplement (PMC4526399)
Supplement: NIHMS696158-supplement-Suppl_2.pdf [file NIHMS696158-supplement-Suppl_2.pdf]

# Cell Metabolism

## HMG-CoA Reductase Inhibitors Bind to PPAR $\alpha$ to Upregulate Neurotrophin Expression in the Brain and Improve Memory in Mice

### Graphical Abstract

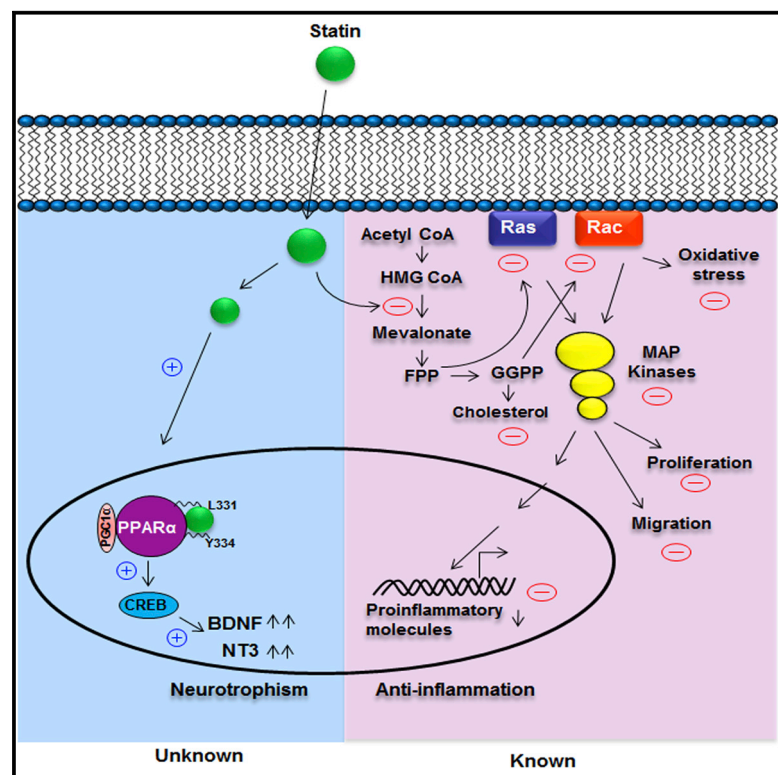

### Authors

Avik Roy, Malabendu Jana, Madhuchhanda Kundu, ..., Chi-Hao Luan, Frank J. Gonzalez, Kalipada Pahan

### Correspondence

kalipada\_pahan@rush.edu

### In Brief

Roy et al. show that the cholesterol-lowering drugs statins increase the expression of neurotrophins in the brain by binding to the ligand-binding domain of PPAR $\alpha$ , independent of the mevalonate pathway. Simvastatin also increases neurotrophin expression and improves memory and learning in a mouse model of Alzheimer's disease.

### Highlights

- Upregulation of neurotrophins by statins independent of the mevalonate pathway
- Statins bind with Leu331 and Tyr334 residues of the ligand-binding domain of PPAR $\alpha$
- Statins produce neurotrophins via the PPAR $\alpha$ -CREB pathway
- Simvastatin increases CREB and improves memory in an animal model of AD via PPAR $\alpha$

# HMG-CoA Reductase Inhibitors Bind to PPAR $\alpha$ to Upregulate Neurotrophin Expression in the Brain and Improve Memory in Mice

Avik Roy,<sup>1</sup> Malabendu Jana,<sup>1</sup> Madhuchhanda Kundu,<sup>1</sup> Grant T. Corbett,<sup>1</sup> Suresh B. Rangaswamy,<sup>1</sup> Rama K. Mishra,<sup>2</sup> Chi-Hao Luan,<sup>3</sup> Frank J. Gonzalez,<sup>4</sup> and Kalipada Pahan<sup>1,5,\*</sup>

<sup>1</sup>Department of Neurological Sciences, Rush University Medical Center, Chicago, IL 60612, USA

<sup>2</sup>Center for Molecular Innovation and Drug Discovery

<sup>3</sup>Weinberg College of Arts and Sciences

Northwestern University, Evanston, IL 60208, USA

<sup>4</sup>Laboratory of Metabolism, Center for Cancer Research, National Cancer Institute, National Institutes of Health, Bethesda, MD 20892, USA

<sup>5</sup>Division of Research and Development, Jesse Brown Veterans Affairs Medical Center, 820 South Darnen Avenue, Chicago, IL 60612, USA

\*Correspondence: [kalipada\\_pahan@rush.edu](mailto:kalipada_pahan@rush.edu)

<http://dx.doi.org/10.1016/j.cmet.2015.05.022>

## SUMMARY

Neurotrophins are important for neuronal health and function. Here, statins, inhibitors of HMG-CoA reductase and cholesterol lowering drugs, were found to stimulate expression of neurotrophins in brain cells independent of the mevalonate pathway. Time-resolved fluorescence resonance energy transfer (FRET) analyses, computer-derived simulation, site-directed mutagenesis, thermal shift assay, and de novo binding followed by electrospray ionization tandem mass spectrometry (ESI-MS) demonstrates that statins serve as ligands of PPAR $\alpha$  and that Leu331 and Tyr 334 residues of PPAR $\alpha$  are important for statin binding. Upon binding, statins upregulate neurotrophins via PPAR $\alpha$ -mediated transcriptional activation of cAMP-response element binding protein (CREB). Accordingly, simvastatin increases CREB and brain-derived neurotrophic factor (BDNF) in the hippocampus of *Ppara* null mice receiving full-length lentiviral PPAR $\alpha$ , but not L331M/Y334D statin-binding domain-mutated lentiviral PPAR $\alpha$ . This study identifies statins as ligands of PPAR $\alpha$ , describes neurotrophic function of statins via the PPAR $\alpha$ -CREB pathway, and analyzes the importance of PPAR $\alpha$  in the therapeutic success of simvastatin in an animal model of Alzheimer's disease.

## INTRODUCTION

Brain-derived neurotrophic factor (BDNF) and NT-3 are neurotrophins belonging to the NGF family of neuronal growth factors. BDNF infusion in the substantia nigra of rodent brain protects dopaminergic neurons, suggesting therapeutic prospects for Parkinson's disease. Moreover, the injection of BDNF in hippocampus and amygdaloid regions leads to the protection of cholinergic neurons (Morse et al., 1993) and improvement in cognitive impairment (Nagahara et al., 2009), implicating BDNF

in Alzheimer's disease. BDNF is also capable of repairing spiny striatal interneurons in Huntington's disease (Kells et al., 2004) and remyelinating the lower motor neurons (Stadelmann et al., 2002) in multiple sclerosis. Therefore, BDNF promotes both structural and functional integrity of neurons to alleviate different neurological disorders. Similarly, NT-3 protects damaged neurons, stimulates neurogenesis and restores neuronal functions in the CNS affected by neurodegenerative diseases (Abe, 2000; Cheng and Mattson, 1994). However, the mechanisms by which the production of these neurotrophins could be therapeutically increased in the CNS are poorly understood.

Although statins are cholesterol-lowering drugs, lovastatin inhibits the activation of NF- $\kappa$ B and the expression of proinflammatory molecules in brain cells via modulation of the mevalonate pathway, thus prompting investigation of the efficacy of statins as an anti-inflammatory and neuroprotective drug (Pahan et al., 1997). Therefore, in addition to cholesterol-lowering, statins are currently known to control inflammation, attenuate cell proliferation and cell migration, favor vasodilation, modulate adaptive immunity, and suppress oxidative stress via modulation of the mevalonate pathway (Pahan, 2006; Roy and Pahan, 2011). Here, we report that statins also exhibit a neurotrophic effect. Different statins upregulate BDNF and NT-3 in neurons, microglia, and astrocytes. Although most of the biological functions of statins depend on their ability to inhibit the mevalonate-cholesterol pathway, statins stimulate the expression of neurotrophins independently of this pathway. Interestingly, we have found that statins directly interact with two critical residues Leu331 and Tyr334 located in the ligand-binding domain of PPAR $\alpha$  to regulate the transcription of CREB, leading to expression of neurotrophic molecules. Finally, we demonstrate that simvastatin increases BDNF and improves memory and learning in an animal model of Alzheimer's disease (AD) via PPAR $\alpha$ .

## RESULTS

### Different Statins Induce the Expression of BDNF and NT-3 in Primary Glia and Neurons

Astrocytes are the predominant cell type in the CNS and we first investigated the effect of time-dependent effect of simvastatin

on BDNF expression in astrocytes. Although simvastatin-mediated increase in BDNF mRNA was not visible at 2 hr, marked upregulation was observed at 5 hr of stimulation (Figure S1A). Accordingly, mevastatin, simvastatin, and pravastatin dose-dependently upregulated the mRNA expression of BDNF and NT-3 in mouse primary astrocytes (Figures S1B and S1C) and microglia (Figures S1D and S1E). Consistently, our protein results show upregulation of BDNF and NT-3 in both astrocytes and microglia by ELISA (Figures S1F and S1G) and immunocytochemistry (Figures S1H and S1I). Similar to mouse astrocytes, mevastatin dose-dependently increased the mRNA (Figures S1J and S1K) and protein (Figure S1L) expression of BDNF in primary human astrocytes. Immunofluorescence analyses revealed that both astrocytes (Figure S1M) and microglia (Figure S1N) in the cortex of simvastatin-fed mice expressed higher levels of BDNF than the brain of saline-fed mice. These results demonstrate that statins are capable of stimulating BDNF and NT-3 in glial cells in culture as well as in vivo in the brain. Earlier, Wu et al. (2008) showed increase in BDNF in vivo in the brain by simvastatin.

While astrocytes and microglia produce neurotrophic factors under neurodegenerative conditions (Kerschensteiner et al., 1999; Roy et al., 2007), neurons are major contributors of neurotrophic factors in normal brain (Maisonpierre et al., 1990). Similar to glia, the different statins stimulated mRNA (Figures S1O and S1P) and protein expression (Figures S1Q and S1R) of neurotrophins in mouse cortical neurons. To further confirm, we knocked down the BDNF gene by small interfering (siRNA) (Figures S1S and S1T) and found that siRNA knock down of BDNF decreased the production of BDNF protein in simvastatin-treated cortical neurons (Figure S1U). Furthermore, glutamate significantly induced the production of BDNF in neurons (Figure S1U). Similar to mouse cells, different statins also dose-dependently stimulated the expression of neurotrophins in primary human neurons (Figures S1V and S1W). Accordingly, oral administration of simvastatin upregulated the neuronal expression of BDNF in the cortex compared with vehicle-fed mice (Figure S1X). Therefore, statins are also able to stimulate the expression of neurotrophic factors in neurons.

### Statin-Induced Expression of BDNF and NT-3 Is Independent of the Mevalonate Pathway

Next, we investigated the mechanism by which statins might upregulate the expression of neurotrophins in glia. Since statins selectively inhibit HMG-CoA reductase, most of the known biological functions of statins depend on their ability to modulate the mevalonate pathway (Endo et al., 1976; Pahan et al., 1997). However, pretreatment with increasing doses of mevalonate and farnesyl pyrophosphate (FPP) failed to abrogate the statin-induced mRNA expression of neurotrophins in astrocytes (Figures 1A and 1B), suggesting that statins upregulate the expression of neurotrophic factors independently of mevalonate metabolites. By contrast, mevalonate, FPP, and geranylgeranyl pyrophosphate (GPP) dose-dependently abrogated simvastatin-mediated inhibition of iNOS in IL-1 $\beta$ -stimulated astrocytes (Figures 1C and 1D). Moreover, the selective inhibition of small G proteins by dominant-negative mutants of p21<sup>ras</sup> ( $\Delta$ Ras) and p21<sup>rac</sup> ( $\Delta$ Rac) failed to stimulate the mRNA expression of BDNF (Figure 1E). On the other hand, both  $\Delta$ Ras and  $\Delta$ Rac

inhibited the IL-1 $\beta$ -induced mRNA expression of iNOS in astrocytes (Figure 1F). Consistent with this finding, while the siRNA-mediated knockdown of p21<sup>ras</sup> failed to increase the expression of BDNF in astrocytes (Figure 1G), it downregulated iNOS protein (Figures 1H–1I) expression. Farnesyl pyrophosphate transferase (FPT) transfers the farnesyl group to p21<sup>ras</sup>, resulting in membrane attachment of p21<sup>ras</sup> and its activation. It was previously reported that FPT inhibitor (FPTi) inhibited the downstream activation of various inflammatory pathways such as NF- $\kappa$ B (Pahan et al., 1997). Interestingly, FPTi had no stimulatory effect on the mRNA expression of BDNF in astrocytes (Figure 1J), suggesting that the farnesylation-p21<sup>ras</sup> pathway is not involved in the upregulation of neurotrophic factors. Similarly, geranylgeranyl transferase transfers the geranylgeranyl group to p21<sup>rac</sup> for its membrane attachment and activation. Similar to FPTi, geranylgeranyl transferase inhibitor (GGTi) also failed to induce the mRNA expression of BDNF (Figure 1J), indicating that the geranylgeranylation-p21<sup>rac</sup> pathway is also not involved in the stimulation of neurotrophic factors. However, as expected, both FPTi and GGTi suppressed the IL-1 $\beta$ -induced expression of iNOS in astrocytes (Figures 1K and 1L). Taken together, these data suggest that statins employ two independent signaling pathways for their neurotrophic and anti-inflammatory effects.

### The Role of PPAR $\alpha$ in Statin-Induced Expression of Neurotrophic Factors in Glia

Simvastatin inhibits IL-1 $\beta$ -induced mRNA (Figures 2A and 2B) and protein (Figures 2C and 2D) expression of iNOS equivalently in wild-type (WT) and *Ppara* null astrocytes, suggesting that simvastatin does not require PPAR $\alpha$  to suppress iNOS. We next examined whether PPAR $\alpha$  was involved in statin-mediated expression of neurotrophic factors in glia. Interestingly, simvastatin dose-dependently stimulated the mRNA expression of BDNF and NT-3 in WT, but not in *Ppara* null, microglia (Figures 2E and 2F) and astrocytes (Figures 2G and 2H). Similarly, simvastatin and pravastatin stimulated the protein expression of BDNF in WT, but not *Ppara* null, astrocytes (Figures 2I–2K) and neurons (Figures S2A and S2B). Together, these results suggest that PPAR $\alpha$  is involved in the statin-mediated upregulation of neurotrophic factors in glia and neurons.

### PPAR $\beta$ and PPAR $\gamma$ Are Not Involved in Statin-Induced Expression of Neurotrophins

Simvastatin was found to stimulate the expression of PPAR $\alpha$ , PPAR $\beta$ , and PPAR $\gamma$  in astrocytes (Figure S2C). Therefore, we next examined the role of PPAR $\beta$  and PPAR $\gamma$  in statin-induced expression of BDNF and NT-3. Although activation of PPAR $\gamma$  has been shown to induce the expression of BDNF (Jin et al., 2013; Kariharan et al., 2015), antisense knockdown of PPAR $\gamma$  and PPAR $\beta$  failed to inhibit simvastatin-stimulated expression of BDNF and NT-3 in astrocytes (Figure S2D), suggesting that neither PPAR $\beta$  nor PPAR $\gamma$  is involved in simvastatin-mediated upregulation of neurotrophic factors. However, it is PPAR $\alpha$ , but not PPAR $\beta$ , that is involved in statin-mediated upregulation of neurotrophic factors, as simvastatin stimulated BDNF expression in *Pparb* null astrocytes (Figure S2E). The direct involvement of PPAR $\alpha$  in the statin-stimulated expression of neurotrophins

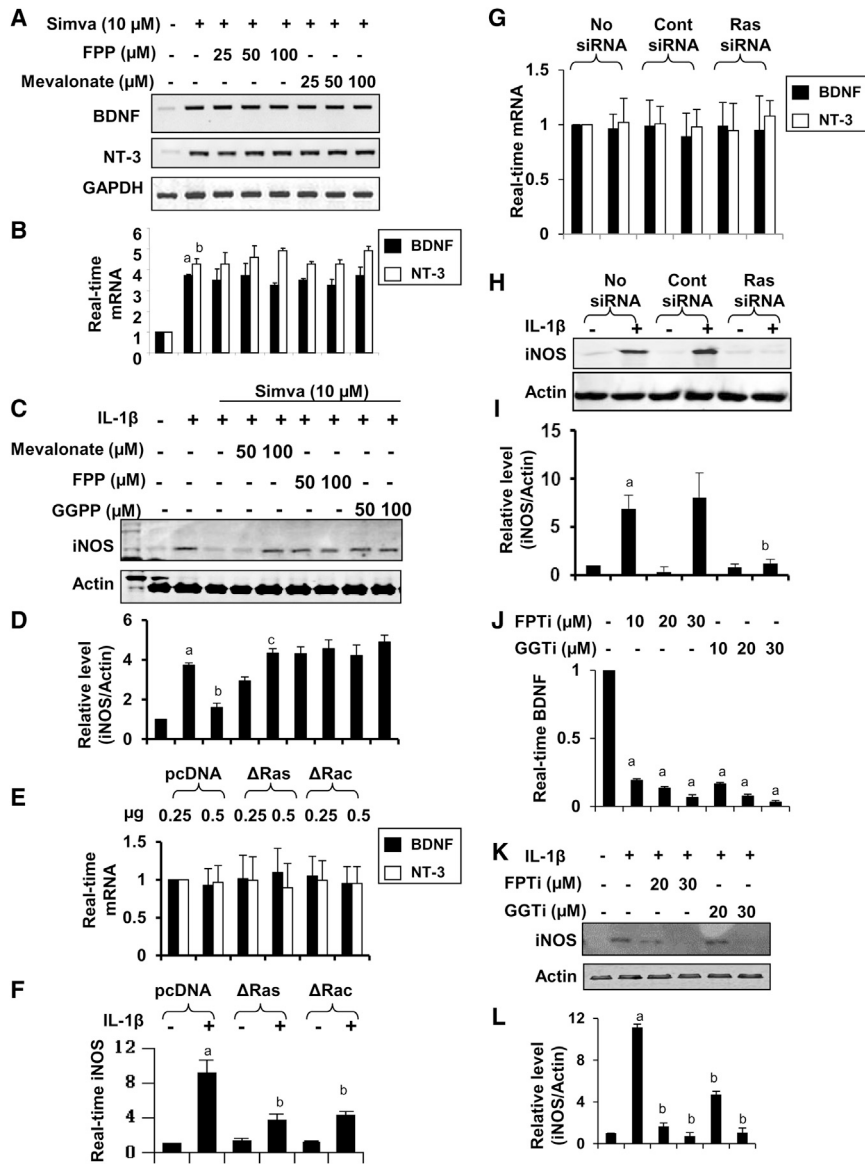

**Figure 1. Anti-inflammatory, but Not Neurotrophic, Activity of Simvastatin Depends on Mevalonate Metabolites and Isoprenylation of p21<sup>ras</sup> and p21<sup>rac</sup>**

(A and B) Mouse astrocytes pre-treated with different doses of farnesyl pyrophosphate (FPP) and mevalonate for 1 hr were stimulated with 10  $\mu$ M simvastatin for another 5 hr under serum-free condition followed by mRNA analysis of neurotrophins by semi-quantitative RT-PCR (A) and real-time PCR (B). Results represent three independent analyses. <sup>a</sup>p < 0.001 versus control-BDNF; <sup>b</sup>p < 0.001 versus control-NT3.

(C) Astrocytes pre-treated with mevalonate, farnesyl pyrophosphate (FPP), and geranylgeranyl pyrophosphate (GGPP) in the presence of 10  $\mu$ M simvastatin for 6 hr were stimulated with IL-1 $\beta$  (20 ng/ml) for another 12 hr followed by analysis of iNOS by western blot.

(D) Bands were scanned and presented as relative to control. <sup>a</sup>p < 0.001 versus control; <sup>b</sup>p < 0.001 versus IL-1 $\beta$ ; <sup>c</sup>p < 0.001 versus IL-1 $\beta$  + Simva.

(E) Astrocytes were transfected with pcDNA3 (empty vector) and dominant-negative mutants of p21<sup>ras</sup> ( $\Delta$ Ras) and p21<sup>rac</sup> ( $\Delta$ Rac). After a 24-hr transfection, cells were incubated with serum-free media for 6 hr followed by analysis of mRNA expression of BDNF and NT-3 by real-time PCR. (F) Similarly, 24 hr after transfection, cells were stimulated with IL-1 $\beta$  (20 ng/ml) for 6 hr followed by monitoring the expression of iNOS mRNA by real-time PCR.

(G) After transfection with control and p21<sup>ras</sup> siRNA, cells were incubated with serum-free media for 6 hr followed by monitoring *Bdnf* and *Nt3* mRNAs by real-time PCR.

(H) Similarly, after transfection, cells were stimulated with IL-1 $\beta$  for 12 hr followed by analysis of iNOS protein by western blot.

(I) Bands were scanned and presented as relative to control. <sup>a</sup>p < 0.001 versus control; <sup>b</sup>p < 0.001 versus control-siRNA-IL-1 $\beta$ .

(J) Astrocytes were incubated with farnesyl phosphotransferase inhibitor (FPTi) and geranylgeranyl phosphotransferase inhibitor (GGTi) for 6 hr followed by analysis of *Bdnf* mRNA by real-time PCR.

(K) Astrocytes pretreated with FPTi and GGTi for 1 hr were stimulated with IL-1 $\beta$  followed by monitoring iNOS protein after a 12-hr incubation. (L) Bands were scanned and presented as relative to control. <sup>a</sup>p < 0.001 versus control; <sup>b</sup>p < 0.001 versus IL-1 $\beta$ . Results represent three independent analyses. See also [Figure S1](#).

was further confirmed when simvastatin stimulated the expression of BDNF in PPAR $\alpha$  cDNA-, but not empty vector-transfected *Ppara* null astrocytes (Figures S2F and S2G). These data suggest that statins require only PPAR $\alpha$  for the induction of BDNF and NT-3 in glial cells. Consistent to the role of PPAR $\alpha$  in the induction of neurotrophins, prototype ligands of PPAR $\alpha$  (WY14643 and gemfibrozil) induced the expression of BDNF and NT-3 in primary astrocytes (Figure S2H). Similar to simvastatin, WY14643 and gemfibrozil were also unable to induce the expression of BDNF and NT-3 in *Ppara* null astrocytes and PPAR $\alpha$  overexpression restored the ability of these ligands to induce CREB and neurotrophins in *Ppara* null astrocytes (Figure S2I).

### Statins Stimulate the Expression of BDNF and NT-3 In Vivo in Mouse Brain via PPAR $\alpha$

Next, we examined whether statins required PPAR $\alpha$  (Figure S3A) for the upregulation of neurotrophins in vivo in the brain. As evident from RT-PCR (Figure S3B) real-time PCR (Figure S3C), the mRNA expression of both BDNF and NT-3 was significantly higher in WT brain than *Ppara* null brain. We have shown that both simvastatin and pravastatin are able to cross the blood-brain barrier (BBB) with variable efficiencies (Ghosh et al., 2009). Oral administration of both pravastatin (Figures S3D and S3E) and simvastatin (Figures S3F and S3G) significantly stimulated the expression of BDNF and NT-3 in vivo in the midbrain of WT, but not *Ppara* null, mice. However, in accordance with their

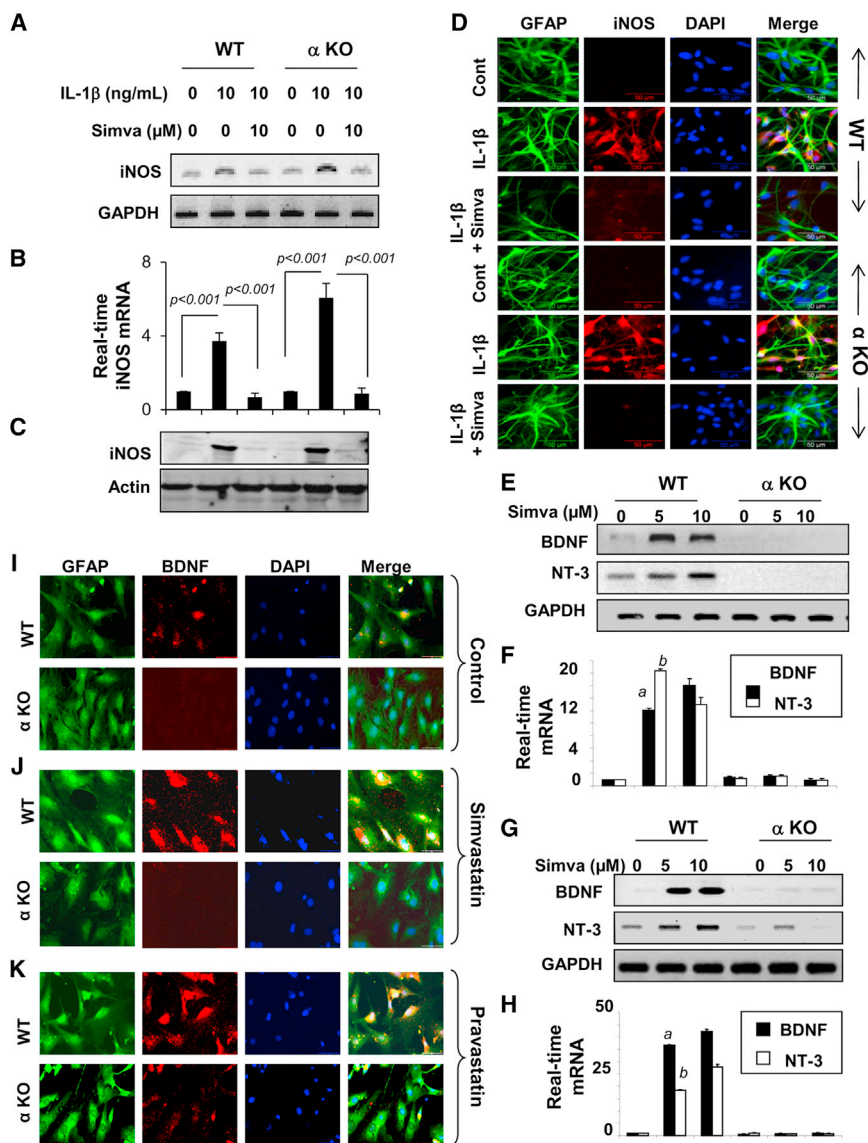

**Figure 2. PPAR $\alpha$  Is Involved in Neurotrophic, but Not Anti-inflammatory, Properties of Statins**

(A–H) Astrocytes isolated from WT and *Ppara* null ( $\alpha$  KO) mice were treated with simvastatin for 6 hr followed by stimulation with IL-1 $\beta$ . After 6 hr, the mRNA expression of iNOS was monitored by RT-PCR (A) and real-time PCR (B). Results are mean  $\pm$  SD of three independent experiments. After 24 hr, the protein level of iNOS was monitored by western blot (C) and immunofluorescence (D). Microglia (E and F) and astrocytes (G and H) isolated from WT and  $\alpha$  KO mice were treated with simvastatin. After 6 hr, cells were analyzed for mRNA encoding BDNF and NT-3 by RT-PCR (E and G) and real-time PCR (F and H). <sup>a</sup> $p$  < 0.001 versus control-BDNF; <sup>b</sup> $p$  < 0.001 versus control-NT-3. (I–K) WT and  $\alpha$  KO primary astrocytes were incubated with 10  $\mu$ M simvastatin (J) and pravastatin (K) under serum-free conditions. After 24 hr, the BDNF level was analyzed by double-label immunofluorescence. Results represent three independent experiments. See also Figures S2 and S3.

tween protein and ligand spaced at a distance as low as 5  $\mu$ m. We adopted TR-FRET for analyzing the interaction between PPAR $\alpha$  and different statins (Figure 3E). Our fluorescence dose-response curve clearly indicated that simvastatin (Figure 3F), mevastatin (Figure 3G), and pravastatin (Figure 3H) dose-dependently induced the TR-FRET signal from PPAR $\alpha$ -PGC1 $\alpha$  complex, suggesting that statins serve as ligand of PPAR $\alpha$ . For comparison, we also used atorvastatin and rosuvastatin and found that the signal strength of emitted fluorescence was the highest for simvastatin among simvastatin, mevastatin, pravastatin, atorvastatin, and rosuvastatin (Figure 3I), suggesting that simvastatin is the strongest ligand of PPAR $\alpha$  among different statins. Our observation was further corroborated once we compared EC<sub>50</sub> value of different statins after 30 min of interaction with PPAR $\alpha$ . The EC<sub>50</sub> value of simvastatin (4.26) was lower than pravastatin, mevastatin, atorvastatin, and rosuvastatin further suggesting that simvastatin is the strongest ligand of PPAR $\alpha$  among different statins. GW7642, a well-known PPAR $\alpha$  agonist, displayed similar dose-response curve (Figure 3F) under similar condition with much lower EC<sub>50</sub> value (1.11), indicating that the binding affinity of statins to PPAR $\alpha$  is still lower than its prototypic ligands.

To characterize the interaction between simvastatin and PPAR $\alpha$  in a molecular level, we carried out in silico docking studies of simvastatin with PPAR $\alpha$ -LBD. These studies generated a reasonable docked pose of the simvastatin molecule in the ligand-binding pocket (Figure 4A). The docked pose of simvastatin showed two potential hydrogen bonds between the statin ligand and two active-site residues, Tyr334 (Y334) and

BBB permeabilities, simvastatin was more effective than pravastatin in stimulating the expression of neurotrophins in vivo in the brain.

### Statins Interact with the Ligand-Binding Domain of PPAR $\alpha$

Next, we were prompted to study how statins employ PPAR $\alpha$  in the expression of neurotrophic factors. It is not known whether statins are ligands of PPAR $\alpha$ . In order to determine whether simvastatin directly interacts with the ligand-binding domain (LBD) of PPAR $\alpha$ , simvastatin-treated astrocytic nuclear extracts were pulled down by the PPAR $\alpha$ -LBD followed by electrospray ionization tandem mass spectrometry (ESI-MS) analysis. Interestingly, we detected the peak for simvastatin itself in the PPAR $\alpha$ -LBD pull-down fraction of simvastatin-treated (Figures 3B and 3D), but not control (Figures 3A and 3C), astrocytes. Time-resolved fluorescence resonance energy transfer (TR-FRET) is a widely accepted technology for monitoring the physical interaction be-

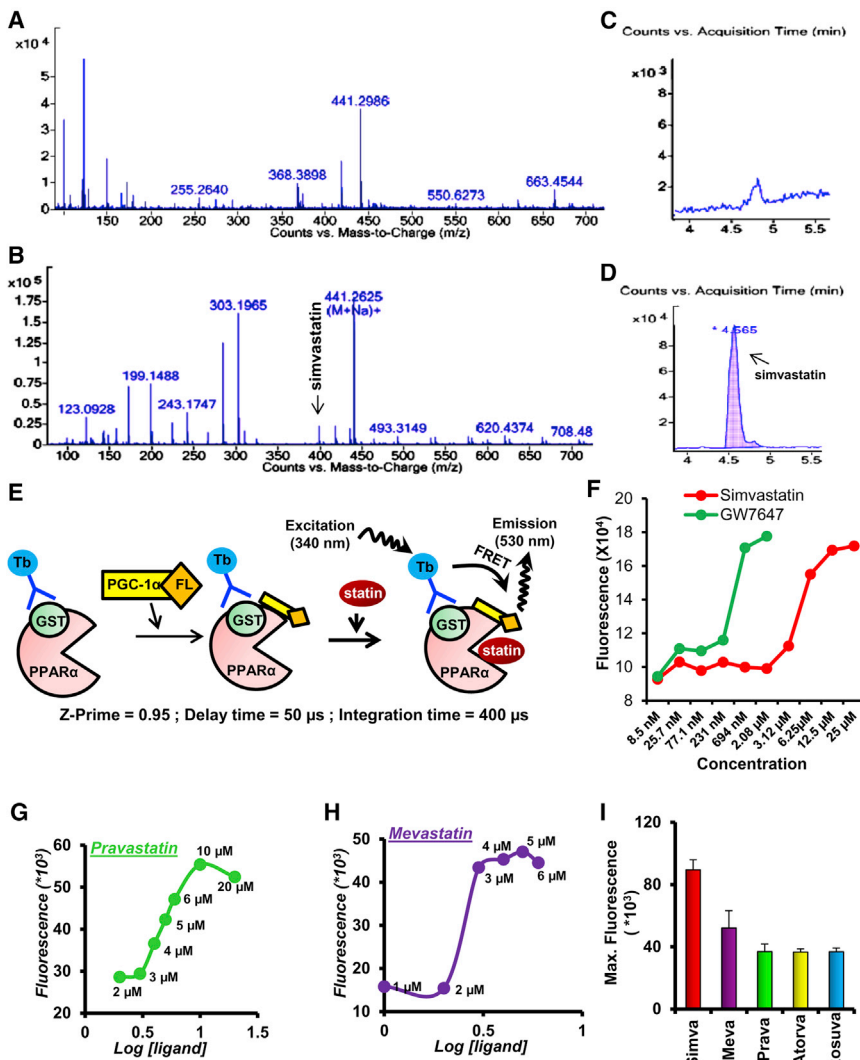

**Figure 3. A High-Throughput Analysis to Study the Interaction between PPAR $\alpha$  and Statin**

(A–D) PPAR $\alpha$ -LBD affinity-purified nuclear fraction extracted from control (A) and simvastatin-treated (B) primary astrocytes was analyzed by electrospray ionization tandem mass spectrometry. Counts versus retention time shows the peak of simvastatin at 4.56 min in simvastatin-treated, but not control, sample. The magnified view of counts versus mass-to-charge ratio clearly shows the peak of simvastatin in the simvastatin-treated (D), but not control (C), sample.

(E) To identify stain group of drugs as ligand of PPAR $\alpha$ , time-resolved fluorescence energy transfer (TR-FRET) technology was adopted. Successful binding of statin with PPAR $\alpha$  would transfer fluorescence energy from Terbium (Tb)-tagged anti-GST antibody to Fluorescein (FL)-tagged PGC-1 $\alpha$  co-activator. The optimum level of emitted fluorescence was measured at 400  $\mu$ -second integration time and 40  $\mu$ -second delay time set in Molecular Device Analyst instrument.

(F–H) Fluorescein emission was recorded with increasing doses of (F) simvastatin, (G) pravastatin, and (H) mevastatin.

(I) TR-FRET was also performed for atorvastatin and rosuvastatin and maximum emitted fluorescence was compared among different statins. Results represent three independent analysis.

Leu331 (L331) (Figure 4B), of the PPAR $\alpha$ -LBD. After obtaining a suitable docked pose of the simvastatin, we attempted to compute the apparent binding energy of the ligand along with the strain energy. Using the MM-GBSA approach, we found the binding energy of simvastatin to be  $-36.0$  Kcal/mol with minimal strain energy of  $0.71$  Kcal/mol, suggesting a strong interaction between simvastatin and PPAR $\alpha$ . Imposing the most stringent docking protocols, a reasonable docked pose of simvastatin was obtained for PPAR $\alpha$ , with a total score of  $8.27$ , a polar score of  $1.54$ , and a crash score of  $-0.71$ . Interestingly, by applying similar docking protocols, we failed to obtain any dock pose of simvastatin for both PPAR $\beta$  and PPAR $\gamma$ , suggesting that the interaction of simvastatin with PPAR $\alpha$ -LBD is specific and not possible with other PPAR isoforms. However, in silico modeling of protein-ligand interaction is hypothetical and requires rigorous experimental analysis for further validation.

Therefore, we performed lentivirus-mediated de novo expression studies, where we overexpressed wild-type (GFP-FL*Ppara*) and statin-binding domain (SBD) mutated PPAR $\alpha$  (GFP- $\Delta$ sbd*Ppara*) gene in *Ppara* null astrocytes followed by the binding analyses with simvastatin. Briefly, we performed site-

directed mutagenesis in mouse PPAR $\alpha$  gene where we replaced Leu331 residue with methionine (L331M) and Tyr334 residue with aspartate (Y334D). After that, we cloned the entire mouse GFP-*Ppara* gene and L331M/Y334D *Ppara* (GFP- $\Delta$ sbd*Ppara*) gene in the pLenti6/V5-TOPO lentiviral expression vector, packaged in lentivirus particle with the help of HEK293FT cells, transduced mouse astrocytes with lentiviral particles for 48 hr, purified full-length (GFP-FLPPAR $\alpha$ ) and mutated PPAR $\alpha$  (GFP- $\Delta$ sbdPPAR $\alpha$ ) proteins in a GFP-affinity column, and finally performed thermal shift assay in order to analyze their conformational stability. Both full-length (Figure 4C) and mutated (Figure 4D) proteins displayed similar pattern of thermal shift with equivalent melting temperature ( $T_m$ ), suggesting that mutations in L331 and Y334 residues did not alter the conformational stability of PPAR $\alpha$ . In another experiment, *Ppara* null astrocytes transduced with different lentiviral PPAR $\alpha$  constructs were incubated with simvastatin for 2 hr and then performed ESI-MS analyses in the GFP-affinity purified nuclear fraction of astrocytes. Interestingly, we observed a very specific peak of simvastatin in the nuclear extract of GFP-PPAR $\alpha$  (Figures 4Ei and 4Eii), but neither in empty GFP vector-transduced (Figures 4Eiii and 4Eiv) nor GFP- $\Delta$ sbd*Ppara*-transduced (Figures 4Ev and 4Evi) nuclear extracts of astrocytes, suggesting that Leu331 and Tyr334 residues are indeed essential for binding with statin. Next, we examined if these two amino acids were required for statin-mediated activation of PPAR $\alpha$ . We measured PPRE-driven luciferase

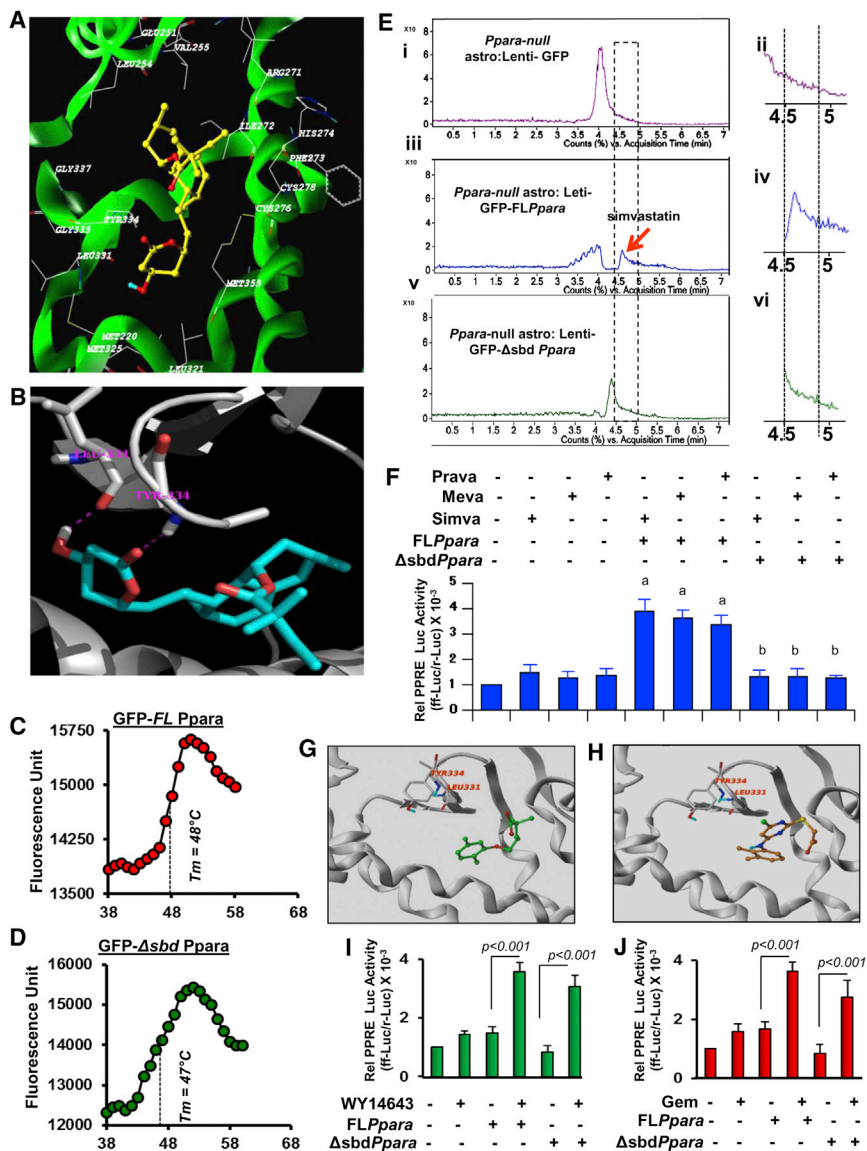

**Figure 4. Proteomic Analysis of Interaction between PPAR $\alpha$  and Simvastatin**

(A) Ribbon representations of the docked complex of PPAR $\alpha$  (3V18.pdb, X-ray, green) and simvastatin show the distribution of amino acids within a 5.00-Å distance of simvastatin.

(B) Magnified view of the docking site shows the interaction between simvastatin and Leu331 and Tyr334.

(C and D) Thermal shift assay of (C) full-length (GFP-FLPpara) and (D) statin-binding domain mutated (GFP-ΔsbdPpara) PPAR $\alpha$  was performed.

(E) De novo binding assay of simvastatin where mouse astrocytes transfected with FLPpara and ΔsbdPpara constructs were treated with simvastatin for 2 hr, nuclear extracts were isolated, passed through GFP column for affinity-purification, and then analyzed by ESI-MS. Representative counts versus acquisition time ratio of simvastatin analyzed in the nuclear extracts of GFP-transduced (i and ii), GFP-FLPpara-transduced (iii and iv), and GFP-ΔsbdPpara-transduced (v and vi) astroglial cells.

(F) PPARE-driven luciferase activity in FLPpara and ΔsbdPpara-transduced Ppara null astrocytes after treatment with simvastatin (top), pravastatin (middle), and mevastatin (bottom). Results are mean  $\pm$  SD of three independent experiments. <sup>a</sup>p < 0.001 versus control; <sup>b</sup>p < 0.001 versus FLPpara.

(G and H) Docked poses of gemfibrozil (G) and WY14673 (H) in PPAR $\alpha$  ligand binding core.

(I and J) PPARE-driven luciferase activity in FLPpara and ΔsbdPpara-transduced Ppara null astrocytes after treatment with WY14643 (I) and gemfibrozil (J). Results are mean  $\pm$  SD of three independent experiments.

$\sim$ 5 Å away from these residues, suggesting that these two known ligands of PPAR $\alpha$  do not interact with L331 and Y334 residues. Consistently, gemfibrozil (Figure 4I) and WY14643 (Figure 4J) stimulated PPARE-luciferase activity in

activity in both FLPpara and Δsbd Ppara-transduced Ppara null astrocytes after treatment of simvastatin, mevastatin, and pravastatin. Interestingly, we observed that different statins stimulated PPARE-luciferase activity in FLPpara-transduced, but not in ΔsbdPpara-transduced, astrocytes (Figure 4F), suggesting that statins require these two amino acids for the activation of PPAR $\alpha$ .

Next, we investigated if WY14643 and gemfibrozil, classical ligands of PPAR $\alpha$ , also required Leu331 and Tyr334 residues for the activation PPAR $\alpha$ . Gemfibrozil (Figure 4G) and WY14643 (Figure 4H) were allowed to dock in the LBD of PPAR $\alpha$  using the similar docking protocols used to dock simvastatin. We found that both the compounds docked very nicely with a good docked scores and with very little penalty scores. However, the binding poses of gemfibrozil (Figure 4G) and WY14673 (Figure 4H) were very different from that of simvastatin. Simvastatin showed potential hydrogen bonds with L331 and Y334 but gemfibrozil and WY14673 were  $\sim$ 6 Å and

ΔsbdPpara-transduced Ppara null astrocytes almost similar to that found FLPpara-transduced cells, confirming that these two ligands do not require L331 and Y334 residues for the activation of PPAR $\alpha$ .

### Statins Increase CREB via PPAR $\alpha$ -Mediated Transcriptional Regulation

Different statins (Figure 5A for mevastatin, pravastatin, and simvastatin; Figure 5B for atorvastatin and rosuvastatin) induced PPAR $\alpha$  response element (PPRE)-driven reporter activity, revealing that different statins are capable of activating PPAR $\alpha$  in astrocytes. However, detailed analysis of BDNF and NT-3 promoters showed no PPARE, ruling out the direct involvement of PPAR $\alpha$  in the upregulation of neurotrophic factors. On the other hand, a number of CRE sequences were found in BDNF and NT-3 promoters. Accordingly, antisense knockdown of CREB suppressed the expression of CREB and inhibited the simvastatin-induced expression of BDNF and NT-3 in mouse

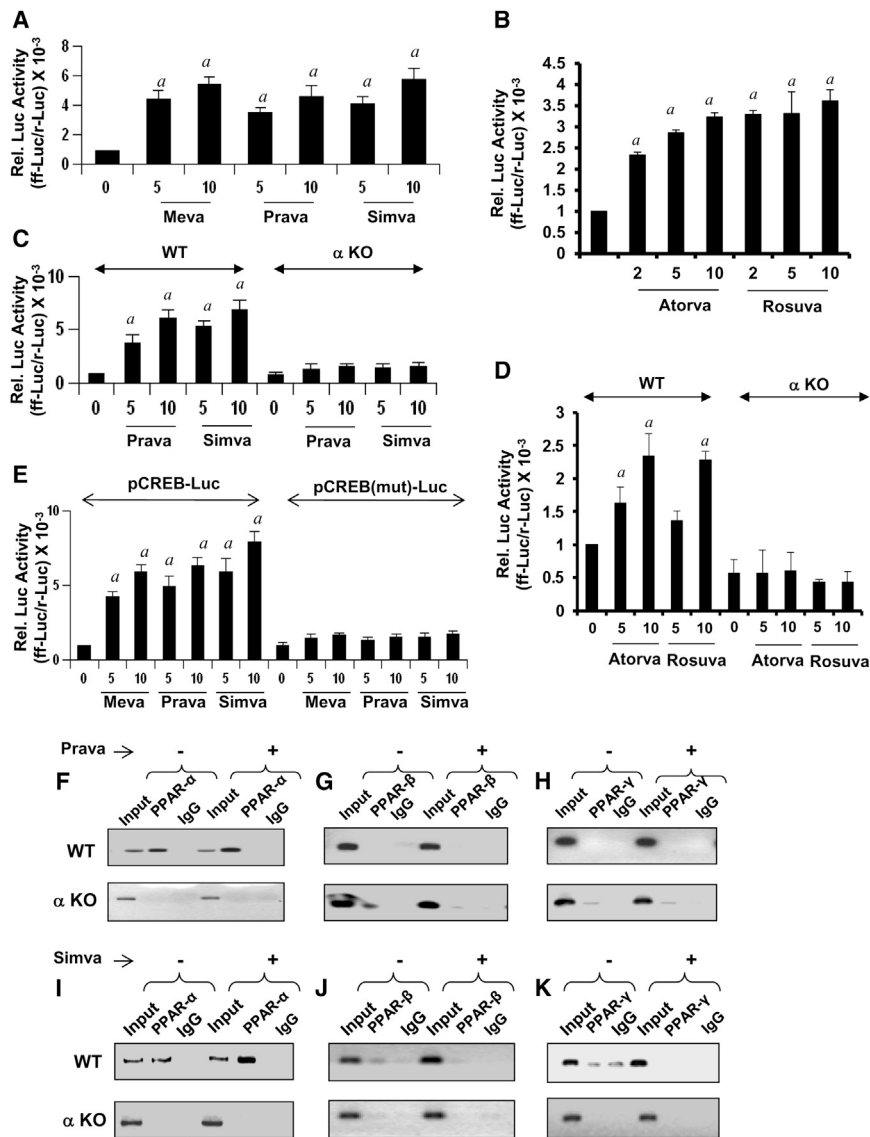

**Figure 5. The Role of PPAR $\alpha$ , PPAR $\beta$ , and PPAR $\gamma$  in Transcriptional Regulation of CREB**

(A–E) Mouse astrocytes were transfected with PPRE luciferase and after a 24-hr transfection, cells were treated with mevastatin, pravastatin, simvastatin (A), atorvastatin, and rosuvastatin (B) for 4 hr, followed by the luciferase assay. Activation of WT CREB promoter by pravastatin, simvastatin in mouse astrocytes (E). Results are means  $\pm$  SD of three independent experiments. <sup>a</sup>*p* < 0.001 versus control.

(F–H) The ChIP assay for PPAR $\alpha$  (F), PPAR $\beta$  (G) and PPAR $\gamma$  (H) in pravastatin-treated WT and  $\alpha$ KO astrocytes.

(I–K) The ChIP assay for PPAR $\alpha$  (I), PPAR $\beta$  (J), and PPAR $\gamma$  (K) in simvastatin-treated WT and  $\alpha$ KO astrocytes. Results represent three separate analyses.

See also [Figures S3 and S5](#).

isolated from WT, but not *Ppara* null, mice. A lower abundance of CREB in different parts of the brain of *Ppara* null animals than of WT and *Pparb* null animals further shows that PPAR $\alpha$ , but not PPAR $\beta$ , controls the expression of CREB in vivo in the brain ([Figures S3H and S3I](#)). Oral administration of simvastatin was also observed to stimulate the expression of CREB in vivo in the cortex of WT, but not *Ppara* null, mice ([Figure S3J](#)), indicating the role of PPAR $\alpha$  in the statin-stimulated expression of CREB in the brain.

Next, we investigated whether reinstatement of PPAR $\alpha$  helps statins to induce the expression of CREB in *Ppara*

astrocytes ([Figure S4A](#)). Similarly, we observed that CREB siRNA, but not control siRNA, inhibited simvastatin-induced expression of BDNF in astrocytes ([Figure S4B](#)). These results indicate the involvement of CREB in simvastatin-mediated upregulation of neurotrophic factors.

Although we did not find any PPRE in BDNF and NT-3 promoters, analysis of the CREB promoter revealed the presence of a conserved PPRE (–1,152 to –1,164 bp upstream of the start sequence) prompting us to study the involvement of PPAR $\alpha$  in the transcriptional regulation of CREB. Different statins stimulated the expression of CREB mRNA in mouse astrocytes and microglia ([Figure S4C](#)). However, statins upregulated the expression of CREB mRNA in astrocytes and microglia isolated from WT, but not *Ppara* null, mice ([Figure S4D](#)). Immunofluorescence analysis also showed that simvastatin upregulated CREB protein in astrocytes isolated from WT, but not *Ppara* null, mice ([Figure S4E](#)). Similarly, simvastatin also upregulated the expression of CREB mRNA ([Figure S4F](#)) and protein ([Figure S4G](#)) in neurons

null cells. PPAR $\alpha$  overexpression increased the basal level of CREB in *Ppara* null astrocytes ([Figure S4H](#)). Although simvastatin was unable to increase the mRNA expression of CREB in *Ppara* null neurons, we observed stimulation of CREB mRNA expression by simvastatin in *Ppara* null neurons after PPAR $\alpha$  overexpression ([Figure S4H](#)). Immunocytochemical analyses also revealed that ectopic overexpression of PPAR $\alpha$  in primary human neurons stimulated basal expression of CREB ([Figure S4K](#)) compared with untransfected ([Figure S4I](#)) or pcDNA-transfected ([Figure S4J](#)) cells and that simvastatin stimulation further increased the level of CREB in PPAR $\alpha$ -overexpressed cells ([Figure S4K](#)). On the other hand, a dominant-negative mutant of human PPAR $\alpha$  ( $\Delta$ PPAR $\alpha$ ) abrogated the expression of CREB, and simvastatin also failed to stimulate the expression of CREB in  $\Delta$ PPAR $\alpha$ -expressed human neurons ([Figure S4L](#)).

To further analyze the role of PPAR $\alpha$  in the transcription of *Creb*, we cloned the mouse *Creb* promoter and then performed site-directed mutagenesis to mutate the PPRE as described



(Roy et al., 2013). Different statins markedly induced *Creb* promoter-driven luciferase activity in astrocytes isolated from WT, but not *Ppara* null, mice (Figure 5C for pravastatin and simvastatin; Figure 5D for atorvastatin and rosuvastatin). However, in WT astrocytes, statins remained unable to induce luciferase activity driven by a *Creb* promoter in which PPRE was mutated (Figure 5E). Next, we performed chromatin immunoprecipitation (ChIP) analysis in which the recruitment of PPAR $\alpha$  to the *Creb* promoter was monitored in untreated and statin-treated astrocytes. After immunoprecipitation of chromatin fragments by antibodies against PPAR $\alpha$ , we were able to amplify a 144-bp fragment encompassing the PPRE of the *Creb* promoter in astrocytes isolated from wild-type, but not *Ppara* null, mice (Figures 5F and 5I). On the other hand, no amplification product of the *Creb* promoter was observed in any of the immunoprecipitates obtained with PPAR $\beta$ , PPAR $\gamma$ , or control IgG (Figures 5G, 5H, 5J, and 5K), suggesting that PPAR $\alpha$ , but neither PPAR $\beta$  nor PPAR $\gamma$ , is recruited to the PPRE of the *Creb* promoter in astrocytes. Both pravastatin (Figure 5F) and simvastatin (Figure 5I) increased the recruitment of PPAR $\alpha$ , but neither PPAR $\beta$  nor PPAR $\gamma$  (Figures 5G, 5H, 5J, and 5K), to the *Creb* promoter in astrocytes.

#### Evaluating the Role of Leu331 and Tyr334 of PPAR $\alpha$ in the Statin-Induced Expression of BDNF in Cultured Astrocytes and In Vivo in Mouse Brain

Next, we examined if Leu331 and Tyr 334 residues of PPAR $\alpha$  were required for statin-mediated upregulation of CREB and BDNF in the cultured astrocytes as well as in vivo in the brain. Mouse primary astrocytes isolated from *Ppara* null mice were transduced with EGFP-constructed lentiviral particles containing either *FLPpara* or  $\Delta$ *sbdbPpara*. Transduction efficiency was more than 90% for both the constructs (Figure 6A). Interestingly, simvastatin significantly upregulated the expression of CREB and BDNF (Figures 6B and 6C) in *FLPpara*-transduced astrocytes, but neither in  $\Delta$ *sbdbPpara*- nor empty vector-transduced astrocytes, which we further confirmed by BDNF ELISA from the astroglial supernatants (Figure 6D). Since BDNF is the major neurotrophic factor that controls the function of hippocampus, we targeted the hippocampus for lentiviral manipulation of the *Ppara* gene. GFP-*FLPpara* and GFP- $\Delta$ *sbdbPpara* lentiviral particles were infused bilaterally in the pyramidal layer of the CA2 region and in the subgranular layer of the dentate gyrus (DG) of 6- to 8-week-old *Ppara* null mice as described earlier (Roy et al., 2013). Three weeks after the infusion, we observed a marked distribution of EGFP constructed PPAR $\alpha$  in the entire pyramidal (CA1, CA2, and CA3) and DG region (Figure 6E), indicating the distribution efficiency of *FLPpara* and  $\Delta$ *sbdbPpara* in our proposed injection coordinates. Simvastatin feeding was started after 6 weeks of lentiviral injection and continued for 2 weeks. Consistent with cell culture results, our immunofluorescence and immunoblot analyses revealed that the bilateral infusion of lentiviral GFP-*FLPpara*, but neither empty vector nor GFP- $\Delta$ *sbdbPpara*, strongly upregulated the expression of CREB (Figures 6G and 6H) and BDNF (Figures 6F–6I) in the hippocampus of simvastatin-fed mice, suggesting that both L331 and Y334 residues of PPAR $\alpha$  are critical for the statin-mediated upregulation of CREB and BDNF.

Next, we wanted to determine whether the simvastatin-mediated upregulation of BDNF production could improve hip-

pocampus-dependent spatial learning and memory in these animals. Therefore, we performed Barnes maze analyses after oral administration of simvastatin (1 mg/kg body weight/day) to *FLPpara* and  $\Delta$ *sbdbPpara* animals for 2 weeks. Since these animals were all on the *Ppara* null background, they spent similar time before entering into the hole (Figure 6L). However, *FLPpara* mice spent more time in the target quadrant (Q1) after statin feeding when compared to statin-fed *Ppara* null mice ( $F_{3,28} = 2.87$ ;  $p \leq 0.05$ ) or statin-fed  $\Delta$ *sbdbPpara* mice ( $F_{3,28} = 3.57$ ;  $p \leq 0.05$ ) (Figures 6J and 6K). Moreover, the number of errors is significantly less in statin-fed *FLPpara* mice (Figure 6M) as compared to statin-fed  $\Delta$ *sbdbPpara* ( $F_{3,28} = 3.14$ ;  $p \leq 0.05$ ) and statin-fed *Ppara* null mice ( $F_{3,28} = 13.07$ ;  $p \leq 0.01$ ), suggesting that both L331 and Y334 residues of PPAR $\alpha$  are crucial for the statin-induced hippocampus-dependent learning and memory.

#### Validating the PPAR $\alpha$ -Mediated Neurotrophic Effect of Statin in FAD5X Mouse Model of AD

In order to analyze the therapeutic importance of PPAR $\alpha$  in statin-mediated upregulation of BDNF, we used FAD5X (B6SJL-Tg(APP<sup>Sw</sup>FILon,PSEN1\*<sup>M146L</sup>\*L286V)6799Vas/J) transgenic mouse model of AD. We generated FAD5X mice in the homozygous *Ppara* null background (Figure 7A). Five-month-old non-Tg, FAD5X, *Ppara* null, and FAD5X/*Ppara* null mice were fed simvastatin (1 mg/kg body weight/day) for 2 weeks. Interestingly, we observed that simvastatin increased the astroglial expression of BDNF in cortex (Figures 7B–7E) of WT (Figure 7B) and FAD5X animals (Figure 7D), but not in *Ppara* null (Figure 7C) and FAD5X/*Ppara* null mice (Figure 7E), suggesting that PPAR $\alpha$  regulates the expression of BDNF during AD-like pathology. Similarly, our immunoblot (Figures 7F and 7G) and ELISA (Figure 7H) analyses revealed that both WT and FAD5X, but neither *Ppara* null nor FAD5X/*Ppara* null, mice showed upregulated expression of BDNF after simvastatin treatment, suggesting the therapeutic prospect of PPAR $\alpha$  in AD. Next, we validated the effect of statin in the process of learning and memory in these animals by analyzing their performance in Barnes maze. Upon simvastatin treatment, both wild-type and FAD5X mice exhibited significant improvement in memory performance on Barnes maze test as shown by errors (Figure 7I) ( $F_{1,14} = 1.4$  [ $>F_c = 0.34$ ] between unfed and simvastatin-fed WT;  $F_{1,14} = 1$  [ $>F_c = 0.26$ ] between unfed and simvastatin-fed FAD5X) and latency (Figure 7J) ( $F_{1,14} = 3.59$  [ $>F_c = 1.72$ ] between unfed and simvastatin-fed WT;  $F_{1,14} = 3.78$  [ $>F_c = 2.87$ ] between unfed and simvastatin-fed FAD5X). However, *Ppara* null and FAD5X/*Ppara* null mice showed no improvement after simvastatin feeding (Figures 7I and 7J). Simvastatin treatment did not significantly alter body weight (Figure 7K), stereotypy (Figure 7L), total distance (Figure 7M), and horizontal activity (Figure 7N) in all groups of mice, suggesting that either simvastatin treatment or genetic alteration do not modulate gross metabolic and motor activities.

## DISCUSSION

### Statins Induce Neurotrophins in Brain Cells

Both BDNF and NT-3 are important for preserving the complex neuronal architecture of hippocampal and cortical circuits. Therefore, increasing the levels of neurotrophins in the CNS is considered to be an important step in halting the progression of several neurodegenerative and neurocognitive diseases.

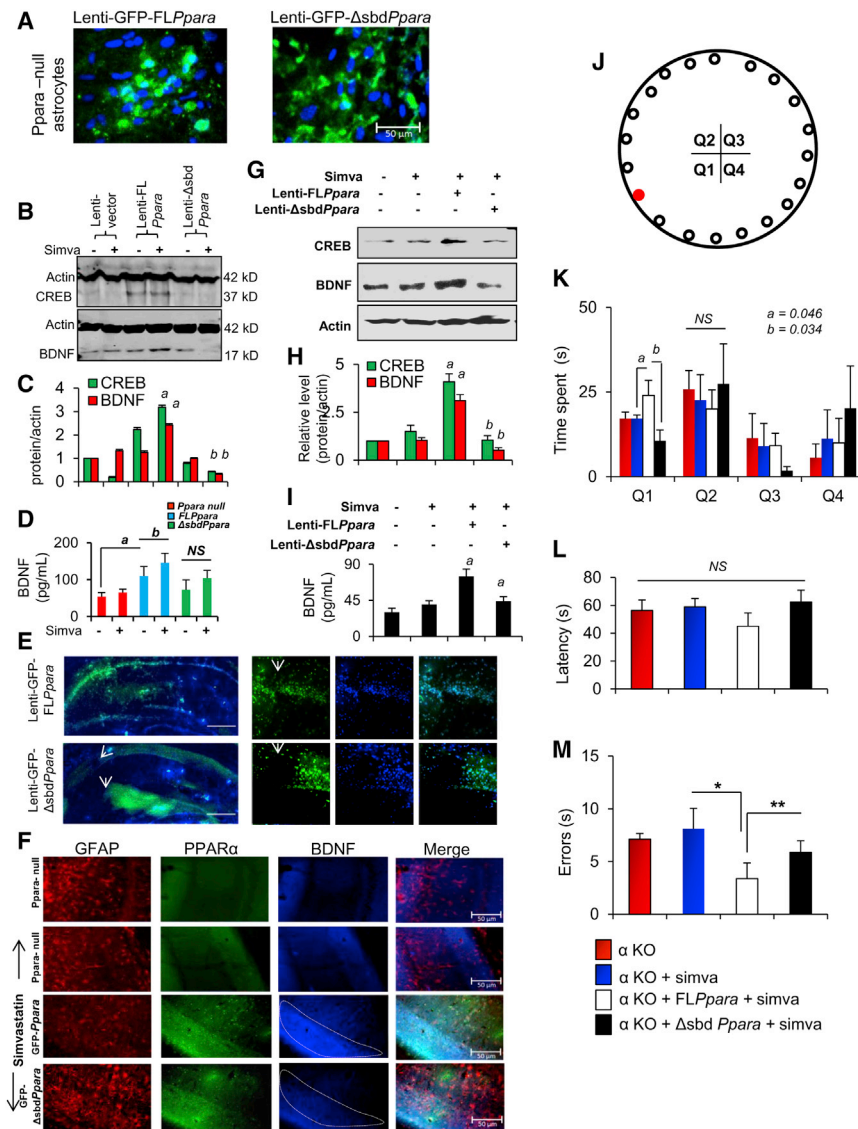

**Figure 6. Lentiviral Manipulation of FLPPara and ΔsbdPPara in the Adult Brain Hippocampus and Its Role in Statin-Stimulated Expression of BDNF**

(A) Astrocytes isolated from *Ppara* null ( $\alpha$ KO) mice were transduced with GFP-FLPPara and GFP-ΔsbdPPara to analyze the transduction efficiency of our plasmids.

(B) Expression of CREB and BDNF were checked by immunoblot analysis.

(C) Bands were scanned and presented as relative to control. Results are mean  $\pm$  SD of three independent experiments. <sup>a</sup>*p* < 0.001 versus lenti-FLPPara control-CREB; <sup>b</sup>*p* < 0.001 versus lenti-FLPPara control-BDNF.

(D) BDNF expression was confirmed by ELISA from the respective supernatants. <sup>a</sup>*p* < 0.001 versus lenti-vector control; <sup>b</sup>*p* < 0.05 versus lenti-FLPPara control.

(E) Both of these constructs were injected bilaterally in the hippocampus of 6- to 8-week-old male C57BL/6 mice with coordinates of 2.54 mm AP axis, 1.30 mm ML (CA2 layer) and 1.80 mm ML (SG layer of DG) axis, and 2.4 mm DV axis. Each animal received four injections with two injections per hemisphere. After 3 weeks, the distribution of lentivirus was detected by microscopic analysis of GFP. Injection sites were magnified and shown in side panels.

(F) After 2 weeks of simvastatin feeding, the expression of BDNF in GFAP-immunoreactive astrocytes were analyzed (green, GFP-PPAR $\alpha$ ; red, GFAP; blue, BDNF).

(G) CREB and BDNF expression were analyzed by immunoblot in the hippocampal extracts of GFP, GFP-FLPPara, and GFP-ΔsbdPPara animals.

(H) Bands were scanned and presented as relative to control. <sup>a</sup>*p* < 0.05 versus simvastatin; <sup>b</sup>*p* < 0.01 versus lenti-FLPPara-simvastatin.

(I) Expression of BDNF was confirmed by ELISA. <sup>a</sup>*p* < 0.01 versus simvastatin; <sup>b</sup>*p* < 0.01 versus lenti-FLPPara-simvastatin.

(J) Performances of statin-fed FLPPara and ΔsbdPPara animals (*n* = 5 per group) in Barnes maze were compared with statin-fed  $\alpha$ KO mice. Target hole placed in first quadrant (Q1) is shown as red.

(K–M) Total time spent in all four quadrants (Q1–Q4), (L) latency and (M) errors were calculated. <sup>a</sup>*p* < 0.05 (= 0.041) versus statin-fed *Ppara* null and <sup>b</sup>*p* < 0.05 (= 0.037) versus statin-fed FLPPara. \**p* < 0.01 versus statin-fed  $\alpha$ KO and \*\**p* < 0.05 (= 0.045) versus statin-fed ΔsbdPPara (0.0015) animals.

Because these neurotrophic molecules do not cross the BBB, gene therapy and stereotaxic injection directly into the brain are now the only available options. However, from the therapeutic perspective, it seems that the best option would be to stimulate/induce the production of BDNF and NT-3 in vivo in the CNS of patients with neurodegenerative disorders. Here, we describe the finding that statins are capable of upregulating neurotrophic factors in brain cells and in vivo in the brain. Although previous studies have reported the neurotrophic role of statins in stroke (Chen et al., 2005) and depression (Tsai, 2007), nothing is known about the role of statins in controlling the expression of neurotrophic factors. According to Tsai (2007), statins may be involved in the upregulation of plasmin (t-PA) and cleavage of pro-BDNF to mature BDNF. However,

this study does not provide any data on the transcriptional upregulation of BDNF by statins.

### A Tale of Two Independent Pathways Regulated by Statins

Statins inhibit HMG-CoA reductase, the regulatory enzyme in the cholesterol biosynthesis pathway and thereby lower the level of cholesterol in patients with hypercholesterolemia. However, statins are also anti-inflammatory (Cordle and Landreth, 2005; Pahan et al., 1997). Although this anti-inflammatory activity of statins is independent of cholesterol, intermediates of the mevalonate pathway abrogate this anti-inflammatory effect (Pahan, 2006; Roy and Pahan, 2011), and statins employ the isoprenylation-p21<sup>ras</sup>/p21<sup>rac</sup> pathway to upregulate proinflammatory

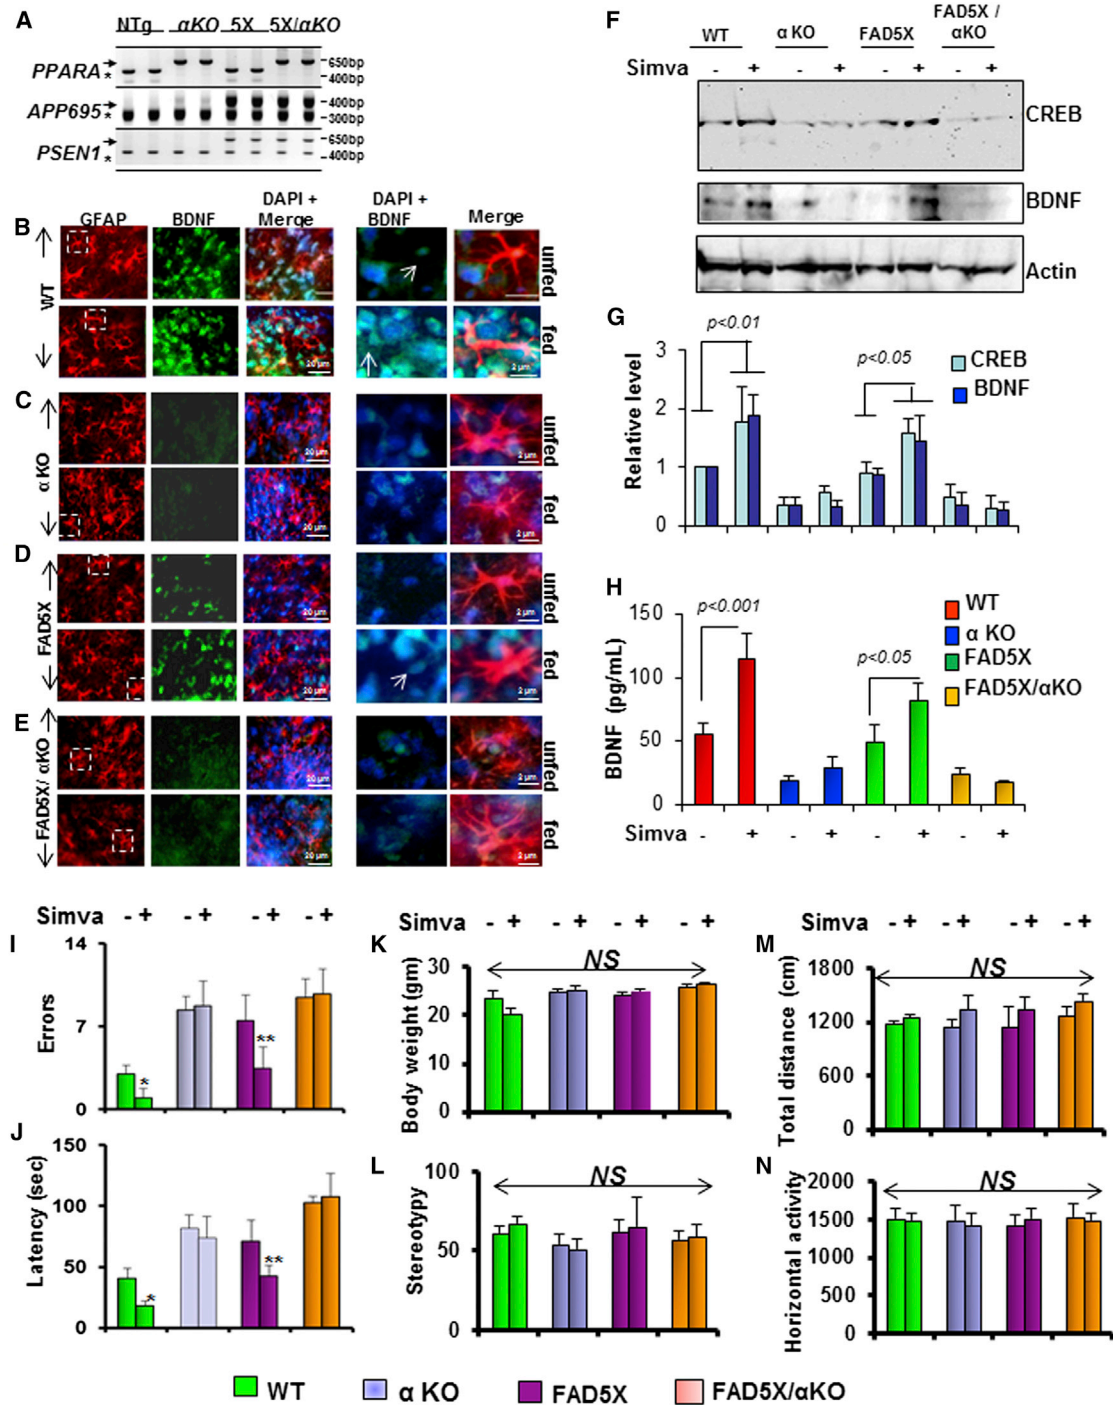

**Figure 7. Simvastatin Increases BDNF in the Brain of FAD5X Mice via PPAR $\alpha$**

(A–E) Genotyping of FAD5X/*Ppara* null (5X/ $\alpha$ KO) mice. Five-month-old mice were fed simvastatin for 2 weeks followed by immunofluorescence analysis of astroglial BDNF (GFAP, red; BDNF, green) in the cortices of (B) wild-type (WT), (C)  $\alpha$ KO, (D) FAD5X, and (E) FAD5X/ $\alpha$ KO animals.

(F and G) Immunoblot (F) and densitometric (G) analyses of CREB and BDNF were performed in the hippocampal extracts.

(H) ELISA of BDNF in the hippocampal extracts.

(I and J) Number of errors (I) and latency (J) in Barnes maze for statin unfed and fed WT,  $\alpha$ KO, FAD5X, and FAD5X/ $\alpha$ KO.

(K–N) All groups of mice were also monitored for body weight (K), stereotypy (L), total distance (M), and horizontal activity (N). Eight mice ( $n = 8$ ) were used in each group. \* $p < 0.05$  versus statin-unfed wild-type control and \*\* $p < 0.05$  versus statin-unfed FAD5X mice.

molecules (Cordle et al., 2005; Roy and Pahan, 2011). Currently, in addition to cholesterol-lowering, statins are known to inhibit small G protein activation, suppress proinflammatory molecules, modulate the adaptive immune response, stimulate endothelial NOS, attenuate migration and proliferation of smooth muscle cells, lower the production of reactive oxygen species, destabilize amyloid- $\beta$  fibrils, attenuate  $\alpha$ -syn aggregation, and mitigate dyskinesia (Pahan, 2006; Roy and Pahan, 2011; Weber et al., 2005). In fact, all these functions are dependent on their ability to suppress either intermediates or the end product of the mevalonate pathway. By contrast, here, we have found that metabolites of the cholesterol biosynthetic pathway, including FPP and mevalonate, inhibitors of isoprenoid transferring enzymes (FPTI and GGTI), and dominant-negative mutants of p21<sup>ras</sup> and p21<sup>rac</sup>, are unable to modulate statin-mediated upregulation of neurotrophic factors, suggesting that statin-mediated inhibition of the cholesterol biosynthetic pathway and/or the isoprenoid-p21<sup>ras</sup>/p21<sup>rac</sup> pathway is/are not involved in the upregulation of neurotrophic factors.

On the other hand, as expected, CREB, a classical transcription factor regulating the synthesis of many neurotrophic factors, was found to be involved in statin-mediated upregulation of neurotrophic factors. Next, we explored the effect of statins on the transcriptional regulation of CREB. Interestingly, promoter analysis of CREB, but not BDNF or NT-3, revealed the presence of a conserved PPRE sequence in its promoter, and we found the involvement of PPAR $\alpha$ , but not PPAR $\beta$  or PPAR $\gamma$ , in statin-mediated upregulation of CREB and neurotrophic factors. ChIP analysis also showed that simvastatin induced the recruitment of PPAR $\alpha$ , but not PPAR $\beta$  or PPAR $\gamma$ , to the CREB promoter. Together, our results suggest that statins upregulate neurotrophic factors via a novel PPAR $\alpha$ -CREB pathway that is independent of their inhibition of the mevalonate pathway. Therefore, statins employ two distinct pathways to execute their biological functions: suppressing the mevalonate pathway for their previously known biological functions and stimulating the PPAR $\alpha$ -CREB pathway for their neurotrophic function (Graphical Abstract).

Apart from neurotrophins, CREB-regulated genes are also involved in the modulation of our basic metabolic processes, including glucose metabolism, fatty acid oxidation, and hepatic lipid mobilization. CREB activates hepatic gluconeogenesis and fatty acid  $\beta$ -oxidation by inducing the expression of PGC-1 and Hes-1 (Herzig et al., 2003) genes. CREB-mediated upregulation of the hepatocyte nuclear factor-4 (HNF-4) gene stimulates the lipid mobilization process in liver (Dell and Hadzopoulou-Cladaras, 1999). Therefore, downregulation of CREB and many other CREB-regulated genes may contribute to different metabolic disorders, including diabetes, arthritis, and obesity. Thus, the importance of our finding is that statins, one of the most commonly used groups of drugs, may be used to modulate multiple metabolic states via PPAR $\alpha$ -mediated upregulation of CREB.

### Statins Serve as Ligands of PPAR $\alpha$

For the last 30 years, statins have been widely considered to be competitive inhibitors of HMG-CoA reductase. However, until now there has been no receptor protein identified for statins. Here, we report that PPAR $\alpha$ , but not PPAR $\beta$  or PPAR $\gamma$ , serves

as a receptor for statins. Detailed energy calculations for simvastatin:PPAR complexes shows greater thermodynamic stability of simvastatin:PPAR $\alpha$  than either simvastatin:PPAR $\beta$  or simvastatin:PPAR $\gamma$ . Our TR-FRET analysis with increasing doses of different statins in PPAR $\alpha$ -PGC-1 $\alpha$  complex, in silico interaction studies, de novo expression studies of full-length and mutated constructs PPAR $\alpha$  followed by ESI-MS analyses, and ESI-MS analysis of PPAR $\alpha$ -LBD pull-down from the nuclear fraction confirm the feasibility and stability of the simvastatin:PPAR $\alpha$  complex. Among simvastatin, mevastatin, pravastatin, atorvastatin, and rosuvastatin, simvastatin was found to be the strongest ligand of PPAR $\alpha$  followed by mevastatin. On the other hand, ligand-binding efficacies of pravastatin, atorvastatin, and rosuvastatin were almost same. According to our detailed structural and molecular techniques, we confirmed that Leu331 and Tyr334 residues of PPAR $\alpha$  LBD are important for statin-binding as L331M/Y334D PPAR $\alpha$  did not show any interaction with statins. Interestingly, known ligands of PPAR $\alpha$  such as WY-14643 and gemfibrozil did not show interaction with Leu331 and Tyr334 residues. While WY-14643 and gemfibrozil docked nicely at the ligand-binding pocket, these ligands were  $\sim 6$  Å and  $\sim 5$  Å away from Leu331 and Tyr334 residues and mutation of these residues also did not abrogate the ability of these ligands to activate PPAR $\alpha$ . These results identify statins as a different group of PPAR $\alpha$  ligands that differ from classical ligands in terms of binding to the PPAR $\alpha$  LBD. Since PPAR $\alpha$  plays an important role in fatty acid oxidation, lipoprotein metabolism, and peroxisome proliferation (Pahan, 2006), our present finding suggests that statins may also regulate these biological processes via PPAR $\alpha$ .

### Simvastatin Increases BDNF and Improves Memory in an Animal Model of AD via PPAR $\alpha$

Simvastatin treatment increased BDNF in hippocampus and cortex and improved memory and learning in the FAD5X mouse model of AD. In contrast, simvastatin remained unable to stimulate BDNF in CNS tissues and increase memory and learning in FAD5X/*Ppara* null mice, suggesting a critical role of PPAR $\alpha$  in the upregulation of neurotrophins in the CNS and protection of memory during AD pathology. Since upregulation of BDNF in the hippocampus and the cortex has therapeutic potential for AD, simvastatin may be beneficial for AD. However, a number of evidences from randomized clinical trials using simvastatin consistently report no benefit in cognition or dementia prevention (Sano et al., 2011; Stadelmann et al., 2002). In some cases, studies failed to provide clear evidence for its therapeutic efficacy in AD (Burgos et al., 2012), calling into question the relevance of preclinical and epidemiologic findings. Again, decreased neuronal cholesterol synthesis has been implicated as a contributor to neurodegeneration (Karasinska and Hayden, 2011; Liu et al., 2010; Valenza et al., 2010) and impaired CNS function in the context of diabetes/insulin resistance (Suzuki et al., 2010). Here, our findings disclose a new site of action (PPAR $\alpha$ ) for statin that could be predictive of therapeutic benefit in AD patients. However, a recent study indicates that women with high level of LDL cholesterol show increased loss of visual memory when prescribed with fenofibrate, a known ligand of PPAR $\alpha$ , over 7 years (Ancelin et al., 2012). This may be due to the facts that higher LDL cholesterol is associated with better memory functioning among the elderly without ApoE4 allele

(West et al., 2008) and that long-term use of fenofibrate affects visual memory via reducing LDL cholesterol. Therefore, the relevance of the statin-PPAR $\alpha$ -CREB connection in humans remains to be established.

## EXPERIMENTAL PROCEDURES

### Isolation of Mouse Primary Astroglia and Microglia

Microglia and astroglia were isolated from mixed glial cultures of 7-day-old mouse pups according to the procedure of Giulian and Baker (1986) as described earlier (Dasgupta et al., 2003; Roy et al., 2006).

### Isolation of Human Fetal Neurons

Primary human neurons were isolated from human fetal brain tissues as described by us earlier (Jana and Pahan, 2004a, 2004b). All of the experimental protocols were reviewed and approved by the Institutional Review Board of the Rush University Medical Center.

### Transfection of Neurons

Primary neurons were transfected with Lipofectamine PLUS (Invitrogen) and Nupherin-neuron (Biomol) as described by us earlier (Saha and Pahan, 2007). Briefly, each well of 6-well plate was transfected with 0.25  $\mu$ g of DNA complexed with Neupherin peptide and Lipofectamine PLUS.

### ChIP

ChIP was performed as described earlier (Roy et al., 2013).

### RT-PCR Analysis

Total RNA was digested with DNase and RT-PCR was carried out as described earlier (Ghosh et al., 2009; Roy et al., 2013).

### Real-Time PCR Analysis

Quantitative real-time PCR was performed in the ABI-7500 standard PCRs (Applied Biosystems) as described earlier (Ghosh et al., 2009; Roy et al., 2013) using TaqMan Universal Master mix and FAM-labeled probes and primers (Applied Biosystems).

### Cloning of the *Creb* Promoter and Site-Directed Mutagenesis

CREB promoter was cloned and subjected to site-directed mutagenesis as described earlier (Roy et al., 2013).

### Lentiviral Cloning of FL PPAR $\alpha$ and L331M/Y334D PPAR $\alpha$

Please see the Supplemental Experimental Procedures.

### Lentiviral Administration of FL PPAR $\alpha$ and $\Delta$ PPAR $\alpha$ in the Adult Mouse Hippocampus

Lentiviral administration was performed as described earlier (Roy et al., 2013).

### Breeding and Development of FAD5X/*Ppara* Null Animals

Please see the Supplemental Experimental Procedures.

### ESI-MS Analysis of PPAR $\alpha$ -Simvastatin Interaction

Please see the Supplemental Experimental Procedures.

### In Silico Structural Analyses of PPAR $\alpha$ , PPAR $\beta$ , and PPAR $\gamma$ Complexed with Simvastatin

Please see the Supplemental Experimental Procedures.

### TR-FRET Analysis

TR-FRET was performed using Lanthascreen TR-FRET PPAR-alpha coactivator assay kit. In this assay, statins were incubated with GST-tagged recombinant PPAR $\alpha$  LBD, Terbium (Tb)-tagged anti GST antibody, and fluorescein (FL)-tagged PGC-1 $\alpha$  as directed in the manufacturer's protocol. The entire reaction was set up in corning 384-well plate by an automated robotic injector. Plate was centrifuged, incubated in dark for 30 min, and then analyzed in molecular devices analyst equipped with dichroic mirror. The excitation and emission were set at 340 nm and 540 nm, respectively.

### Thermal Shift Assay

Thermal shift assay was performed in Applied Biosystems 7500 standard real-time thermal cycler with thermal shift dye kit (Life Technologies). For each reaction, purified protein (0.5  $\mu$ g to 1  $\mu$ g) was added to 18  $\mu$ l of thermal shift buffer and 1–2  $\mu$ l of dye. Reaction was set 96-well PCR plate in dark and then placed in the thermal cycler using the following two-stage program ([25°C for 2 min] 1 cycle; [27°C for 15 s, 26°C for 1 min] 70 cycles; auto increment 1°C for both stages). The filter was set at ROX with no quencher filter and no passive filter.

### Statistical Analyses

All values are expressed as the mean  $\pm$  SD. Differences among means were analyzed using one- or two-way ANOVA with time or genotype as the independent factors. Differences in behavioral measures were examined by independent one-way or repeated-measures ANOVAs using SPSS. Homogeneity of variance between test groups was examined using Levene's test. Post hoc analyses of between-subjects effects were conducted using Scheffe's, Tukey's or Games-Howell tests, where appropriate.  $p < 0.05$  was considered statistically significant.

## SUPPLEMENTAL INFORMATION

Supplemental Information includes Supplemental Experimental Procedures and four figures and can be found with this article online at <http://dx.doi.org/10.1016/j.cmet.2015.05.022>.

## ACKNOWLEDGMENTS

This study was supported by grants from NIH (AT6681 and NS83054) and Alzheimer's Association (IIRG-12-241179). The authors would like to thank ChemCore at the Center for Molecular Innovation and Drug Discovery, Northwestern University, funded by the Chicago Biomedical Consortium.

Received: January 19, 2015

Revised: April 20, 2015

Accepted: May 23, 2015

Published: June 25, 2015

## REFERENCES

- Abe, K. (2000). Therapeutic potential of neurotrophic factors and neural stem cells against ischemic brain injury. *J. Cereb. Blood Flow Metab.* 20, 1393–1408.
- Ancelin, M.L., Carrière, I., Barberger-Gateau, P., Auriacombe, S., Rouaud, O., Fourianos, S., Berr, C., Dupuy, A.M., and Ritchie, K. (2012). Lipid lowering agents, cognitive decline, and dementia: the three-city study. *J. Alzheimers Dis.* 30, 629–637.
- Burgos, J.S., Benavides, J., Douillet, P., Velasco, J., and Valdivieso, F. (2012). How statins could be evaluated successfully in clinical trials for Alzheimer's disease? *Am. J. Alzheimers Dis. Other Demen.* 27, 151–153.
- Chen, J., Zhang, C., Jiang, H., Li, Y., Zhang, L., Robin, A., Katakowski, M., Lu, M., and Chopp, M. (2005). Atorvastatin induction of VEGF and BDNF promotes brain plasticity after stroke in mice. *J. Cereb. Blood Flow Metab.* 25, 281–290.
- Cheng, B., and Mattson, M.P. (1994). NT-3 and BDNF protect CNS neurons against metabolic/excitotoxic insults. *Brain Res.* 640, 56–67.
- Cordle, A., and Landreth, G. (2005). 3-Hydroxy-3-methylglutaryl-coenzyme A reductase inhibitors attenuate beta-amyloid-induced microglial inflammatory responses. *J. Neurosci.* 25, 299–307.
- Cordle, A., Koenigsnecht-Talbot, J., Wilkinson, B., Limpert, A., and Landreth, G. (2005). Mechanisms of statin-mediated inhibition of small G-protein function. *J. Biol. Chem.* 280, 34202–34209.
- Dasgupta, S., Jana, M., Liu, X., and Pahan, K. (2003). Role of very-late antigen-4 (VLA-4) in myelin basic protein-primed T cell contact-induced expression of proinflammatory cytokines in microglial cells. *J. Biol. Chem.* 278, 22424–22431.

- Dell, H., and Hadzopoulou-Cladaras, M. (1999). CREB-binding protein is a transcriptional coactivator for hepatocyte nuclear factor-4 and enhances apolipoprotein gene expression. *J. Biol. Chem.* *274*, 9013–9021.
- Endo, A., Kuroda, M., and Tsujita, Y. (1976). ML-236A, ML-236B, and ML-236C, new inhibitors of cholesterol synthesis produced by *Penicillium citrinum*. *J. Antibiot.* *29*, 1346–1348.
- Ghosh, A., Roy, A., Matras, J., Brahmachari, S., Gendelman, H.E., and Pahan, K. (2009). Simvastatin inhibits the activation of p21ras and prevents the loss of dopaminergic neurons in a mouse model of Parkinson's disease. *J. Neurosci.* *29*, 13543–13556.
- Giulian, D., and Baker, T.J. (1986). Characterization of amoeboid microglia isolated from developing mammalian brain. *J. Neurosci.* *6*, 2163–2178.
- Herzig, S., Hedrick, S., Morante, I., Koo, S.H., Galimi, F., and Montminy, M. (2003). CREB controls hepatic lipid metabolism through nuclear hormone receptor PPAR-gamma. *Nature* *426*, 190–193.
- Jana, A., and Pahan, K. (2004a). Fibrillar amyloid-beta peptides kill human primary neurons via NADPH oxidase-mediated activation of neutral sphingomyelinase. Implications for Alzheimer's disease. *J. Biol. Chem.* *279*, 51451–51459.
- Jana, A., and Pahan, K. (2004b). Human immunodeficiency virus type 1 gp120 induces apoptosis in human primary neurons through redox-regulated activation of neutral sphingomyelinase. *J. Neurosci.* *24*, 9531–9540.
- Jin, J., Albers, J., Guo, Z., Peng, Q., Rudow, G., Troncoso, J.C., Ross, C.A., and Duan, W. (2013). Neuroprotective effects of PPAR- $\gamma$  agonist rosiglitazone in N171-82Q mouse model of Huntington's disease. *J. Neurochem.* *125*, 410–419.
- Karasinska, J.M., and Hayden, M.R. (2011). Cholesterol metabolism in Huntington disease. *Nat. Rev. Neurol.* *7*, 561–572.
- Kariharan, T., Nanayakkara, G., Parameshwaran, K., Bagasrawala, I., Ahuja, M., Abdel-Rahman, E., Amin, A.T., Dhanasekaran, M., Suppiramaniam, V., and Amin, R.H. (2015). Central activation of PPAR-gamma ameliorates diabetes induced cognitive dysfunction and improves BDNF expression. *Neurobiol. Aging* *36*, 1451–1461.
- Kells, A.P., Fong, D.M., Dragunow, M., During, M.J., Young, D., and Connor, B. (2004). AAV-mediated gene delivery of BDNF or GDNF is neuroprotective in a model of Huntington disease. *Mol. Ther.* *9*, 682–688.
- Kerschensteiner, M., Gallmeier, E., Behrens, L., Leal, V.V., Misgeld, T., Klinkert, W.E., Kolbeck, R., Hoppe, E., Oropeza-Wekerle, R.L., Bartke, I., et al. (1999). Activated human T cells, B cells, and monocytes produce brain-derived neurotrophic factor in vitro and in inflammatory brain lesions: a neuroprotective role of inflammation? *J. Exp. Med.* *189*, 865–870.
- Liu, J.P., Tang, Y., Zhou, S., Toh, B.H., McLean, C., and Li, H. (2010). Cholesterol involvement in the pathogenesis of neurodegenerative diseases. *Mol. Cell. Neurosci.* *43*, 33–42.
- Maisonpierre, P.C., Belluscio, L., Squinto, S., Ip, N.Y., Furth, M.E., Lindsay, R.M., and Yancopoulos, G.D. (1990). Neurotrophin-3: a neurotrophic factor related to NGF and BDNF. *Science* *247*, 1446–1451.
- Morse, J.K., Wiegand, S.J., Anderson, K., You, Y., Cai, N., Carnahan, J., Miller, J., DiStefano, P.S., Altar, C.A., Lindsay, R.M., et al. (1993). Brain-derived neurotrophic factor (BDNF) prevents the degeneration of medial septal cholinergic neurons following fimbria transection. *J. Neurosci.* *13*, 4146–4156.
- Nagahara, A.H., Merrill, D.A., Coppola, G., Tsukada, S., Schroeder, B.E., Shaked, G.M., Wang, L., Blesch, A., Kim, A., Conner, J.M., et al. (2009). Neuroprotective effects of brain-derived neurotrophic factor in rodent and primate models of Alzheimer's disease. *Nat. Med.* *15*, 331–337.
- Pahan, K. (2006). Lipid-lowering drugs. *Cell. Mol. Life Sci.* *63*, 1165–1178.
- Pahan, K., Sheikh, F.G., Nambodiri, A.M., and Singh, I. (1997). Lovastatin and phenylacetate inhibit the induction of nitric oxide synthase and cytokines in rat primary astrocytes, microglia, and macrophages. *J. Clin. Invest.* *100*, 2671–2679.
- Roy, A., and Pahan, K. (2011). Prospects of statins in Parkinson disease. *Neuroscientist* *17*, 244–255.
- Roy, A., Fung, Y.K., Liu, X., and Pahan, K. (2006). Up-regulation of microglial CD11b expression by nitric oxide. *J. Biol. Chem.* *281*, 14971–14980.
- Roy, A., Liu, X., and Pahan, K. (2007). Myelin basic protein-primed T cells induce neurotrophins in glial cells via  $\alpha$ 5 $\beta$ 3 [corrected] integrin. *J. Biol. Chem.* *282*, 32222–32232.
- Roy, A., Jana, M., Corbett, G.T., Ramaswamy, S., Kordower, J.H., Gonzalez, F.J., and Pahan, K. (2013). Regulation of cyclic AMP response element binding and hippocampal plasticity-related genes by peroxisome proliferator-activated receptor  $\alpha$ . *Cell Rep.* *4*, 724–737.
- Saha, R.N., and Pahan, K. (2007). Differential regulation of Mn-superoxide dismutase in neurons and astroglia by HIV-1 gp120: Implications for HIV-associated dementia. *Free Radic. Biol. Med.* *42*, 1866–1878.
- Sano, M., Bell, K.L., Galasko, D., Galvin, J.E., Thomas, R.G., van Dyck, C.H., and Aisen, P.S. (2011). A randomized, double-blind, placebo-controlled trial of simvastatin to treat Alzheimer disease. *Neurology* *77*, 556–563.
- Stadelmann, C., Kerschensteiner, M., Misgeld, T., Brück, W., Hohlfeld, R., and Lassmann, H. (2002). BDNF and gp145trkB in multiple sclerosis brain lesions: neuroprotective interactions between immune and neuronal cells? *Brain* *125*, 75–85.
- Suzuki, R., Lee, K., Jing, E., Biddinger, S.B., McDonald, J.G., Montine, T.J., Craft, S., and Kahn, C.R. (2010). Diabetes and insulin in regulation of brain cholesterol metabolism. *Cell Metab.* *12*, 567–579.
- Tsai, S.J. (2007). Statins may enhance the proteolytic cleavage of proBDNF: implications for the treatment of depression. *Med. Hypotheses* *68*, 1296–1299.
- Valenza, M., Leoni, V., Karasinska, J.M., Petricca, L., Fan, J., Carroll, J., Pouladi, M.A., Fossale, E., Nguyen, H.P., Riess, O., et al. (2010). Cholesterol defect is marked across multiple rodent models of Huntington's disease and is manifest in astrocytes. *J. Neurosci.* *30*, 10844–10850.
- Weber, M.S., Prod'homme, T., Steinman, L., and Zamvil, S.S. (2005). Drug Insight: using statins to treat neuroinflammatory disease. *Nat. Clin. Pract. Neurol.* *1*, 106–112.
- West, R., Beeri, M.S., Schmeidler, J., Hannigan, C.M., Angelo, G., Grossman, H.T., Rosendorff, C., and Silverman, J.M. (2008). Better memory functioning associated with higher total and low-density lipoprotein cholesterol levels in very elderly subjects without the apolipoprotein e4 allele. *Am. J. Geriatr. Psychiatry* *16*, 781–785.
- Wu, H., Lu, D., Jiang, H., Xiong, Y., Qu, C., Li, B., Mahmood, A., Zhou, D., and Chopp, M. (2008). Simvastatin-mediated upregulation of VEGF and BDNF, activation of the PI3K/Akt pathway, and increase of neurogenesis are associated with therapeutic improvement after traumatic brain injury. *J. Neurotrauma* *25*, 130–139.

**Cell Metabolism, Volume 22**

**Supplemental Information**

**HMG-CoA Reductase Inhibitors Bind to PPAR $\alpha$  to Upregulate Neurotrophin Expression in the Brain and Improve Memory in Mice**

Avik Roy, Malabendu Jana, Madhuchhanda Kundu, Grant T. Corbett, Suresh B. Rangaswamy, Rama K. Mishra, Chi-Hao Luan, Frank J. Gonzalez, and Kalipada Pahan

Supplemental data  
Supplemental Figures

Figure S1 (part A)

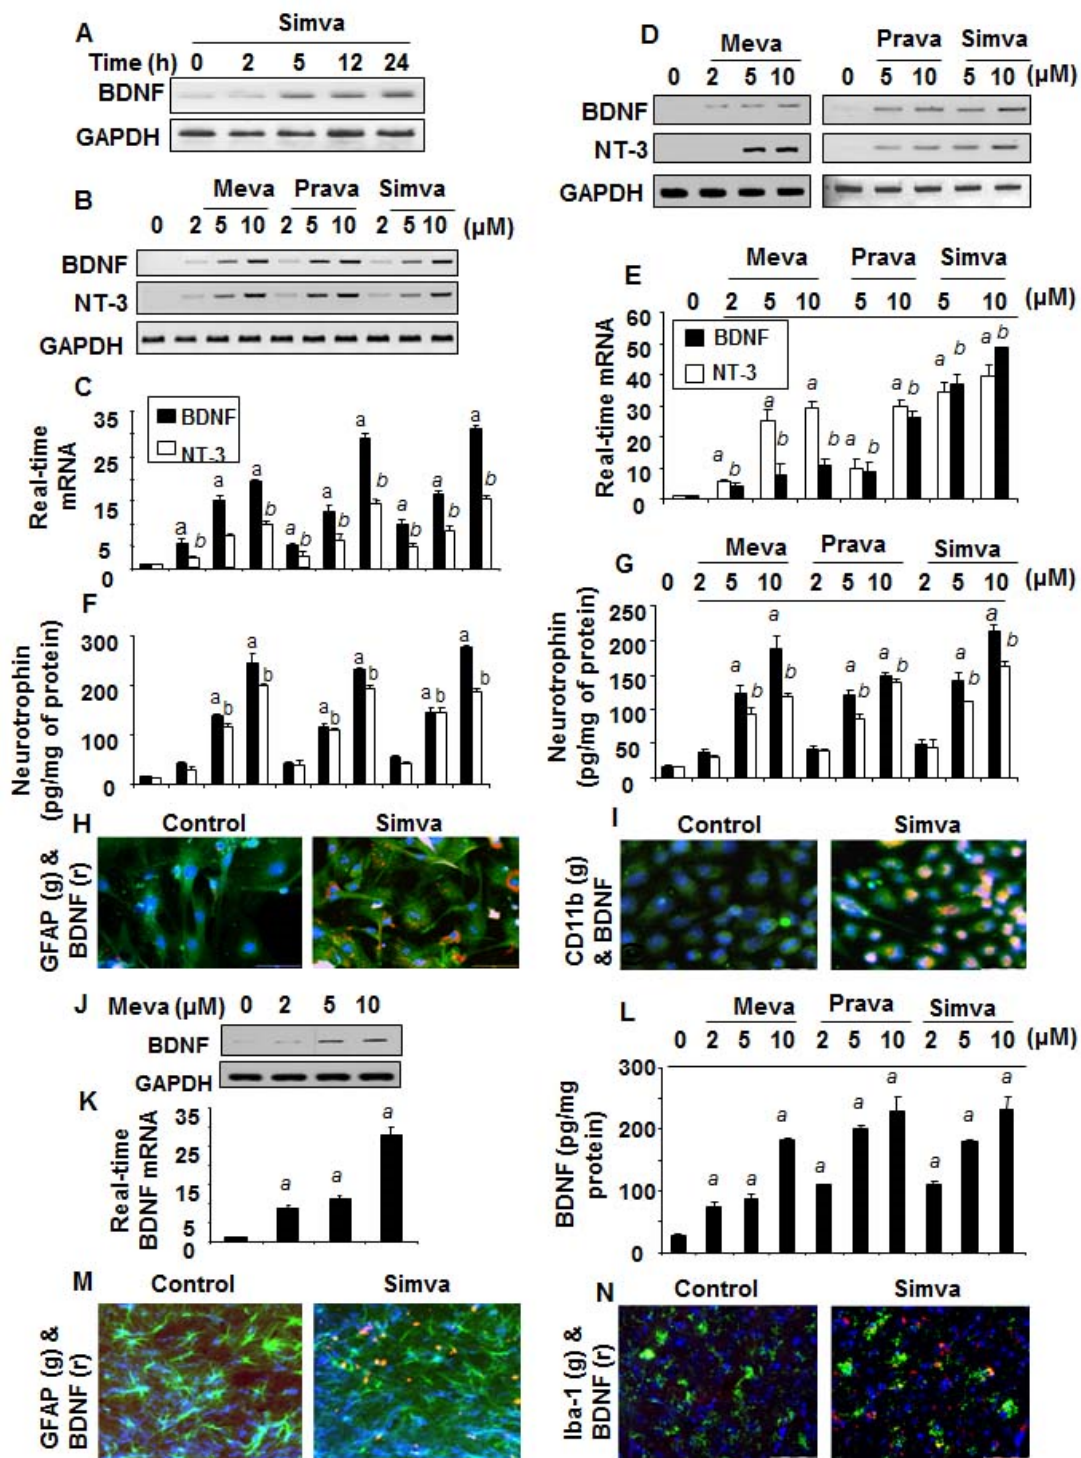



Figure S1 (part B)

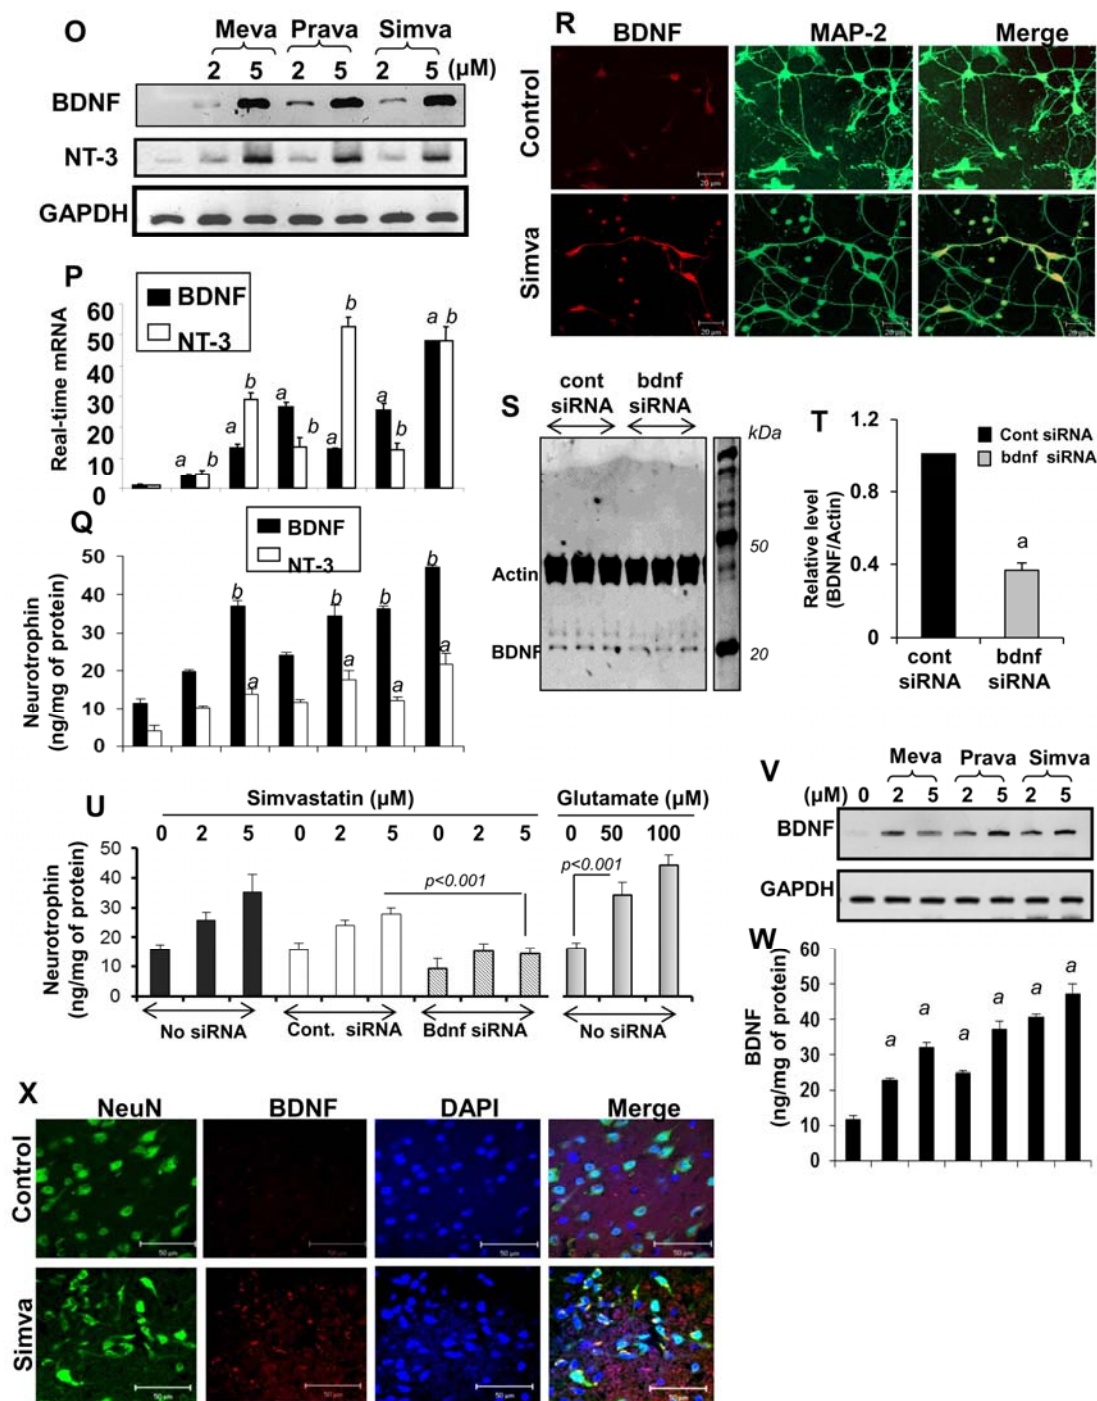

Figure S1, related to Figure 1. Statins upregulate the expression of neurotrophic factors in astrocytes, microglia and neurons. A) Mouse primary astrocytes were stimulated with 5 μM simvastatin for different time periods followed by monitoring the mRNA expression of BDNF by semi-quantitative RT-PCR. Mouse primary astrocytes (B,

C) and microglia (D, E) were stimulated with different doses of mevastatin, pravastatin, and simvastatin under serum-free conditions. After a 5-h incubation, the mRNA expression of BDNF and NT3 was analyzed by semi-quantitative RT-PCR (B and D) and quantitative real-time PCR (C and E). Data are means  $\pm$  SEM of three independent experiments. <sup>a</sup> $p < 0.05$ , <sup>b</sup> $p < 0.01$ , and <sup>c</sup> $p < 0.001$  vs control BDNF; <sup>a\*</sup> $p < 0.05$ , <sup>b\*</sup> $p < 0.01$ , and <sup>c\*</sup> $p < 0.01$  vs control NT3. Similarly, <sup>s</sup> $p < 0.01$ , <sup>h</sup> $p < 0.01$ , and <sup>i</sup> $p < 0.001$  vs control BDNF; <sup>g\*</sup> $p < 0.05$ , <sup>h\*</sup> $p < 0.05$ , and <sup>i\*</sup> $p < 0.01$  vs control NT3. After a 24-h incubation, protein levels of BDNF and NT3 were monitored in the supernatants of astrocytes (F) and microglia (G) by ELISA. <sup>d,e,f,j,k,l</sup> $p < 0.05$  vs control BDNF and <sup>d\*,e\*,f\*,j\*,k\*,l\*</sup> $p < 0.05$  vs control NT3. Mouse primary astrocytes (H) and microglia (I) were treated with 10  $\mu$ M simvastatin under serum-free conditions. After 24 h, BDNF expression was analyzed by immunofluorescence. Human primary astrocytes were treated with different doses of mevastatin for 5 h followed by mRNA analysis of BDNF by semi-quantitative RT-PCR (J) and quantitative real-time PCR (K). Data are means  $\pm$  SEM for three independent experiments. <sup>m</sup> $p < 0.01$  vs control. (L) After a 24-h incubation, the protein level of BDNF was monitored in supernatants by ELISA. Data are means  $\pm$  SEM of three independent experiments with <sup>n</sup> $p < 0.01$ , <sup>o</sup> $p < 0.005$ , and <sup>p</sup> $p < 0.005$  vs control. Mice (n=5) were fed simvastatin (1mg/kg bwt/d) via gavage. After 5 d, animals were perfused and their cortical sections were analyzed for BDNF (red) with either GFAP (M) or Iba-1 (N). Results represent analysis of two sections from each of five mice per group. Mouse cortical neurons were stimulated with different doses of mevastatin, pravastatin and simvastatin under serum free condition. After 5 h of incubation, the mRNA expression of BDNF and NT-3 was analyzed by semi-quantitative RT-PCR (O) and quantitative real-time PCR (P). Data are mean  $\pm$  SD of three independent experiments. <sup>a</sup> $p < 0.001$  vs control BDNF; <sup>b</sup> $p < 0.001$  vs control NT-3, After 24 h of incubation, levels of BDNF and NT-3 in the supernatants of neurons (Q) were assayed by ELISA. Data are mean  $\pm$  SD of three independent experiments. <sup>a</sup> $p < 0.001$  vs control BDNF; <sup>b</sup> $p < 0.001$  vs control NT-3, The protein expression of BDNF was analyzed by immunofluorescence analyses (R). S) Mouse cortical neurons were transfected with control or BDNF siRNA and after 48 h of transfection, the level of BDNF was examined by Western blot. Actin was run as a loading control. T) Bands were scanned and presented as relative to control. <sup>a</sup> $p < 0.001$  vs control-siRNA. U) Cells were transfected with control or BDNF siRNA. After 48 h of transfection, cells were stimulated with simvastatin for another 24 h. In a parallel experiment, cells were also stimulated with glutamate for 24 h. Supernatants were analyzed for BDNF by ELISA. Results are mean  $\pm$  SD of three separate experiments. Human fetal neurons were incubated with different doses of mevastatin, pravastatin and simvastatin under serum free condition. After 5 h of incubation, the mRNA expression of BDNF was analyzed by RT-PCR (V) and after 24 h of stimulation, protein levels of BDNF and NT-3 were measured in supernatants by ELISA (W). Data are mean  $\pm$  SD of three independent experiments. <sup>a</sup> $p < 0.001$  vs control BDNF; <sup>b</sup> $p < 0.001$  vs control NT-3. (X) Male C57/BL6 mice (6-8 wk old) were treated with simvastatin (1 mg/kg bwt/d) via gavage. After 7 d, animals were perfused and their cortical sections were analyzed for the expression of BDNF [Red = BDNF; Green = NeuN; Blue = DAPI]. Results represent analysis of three sections of each of three mice (n=3) per group.

Figure S2 (part A)

|          |                         |   |   |   |   |   |   |   |   |   |   |   |   |   |   |
|----------|-------------------------|---|---|---|---|---|---|---|---|---|---|---|---|---|---|
| <b>A</b> | Meva ( $\mu\text{M}$ )  | - | 2 | 5 | - | - | - | - | - | 2 | 5 | - | - | - | - |
|          | Prava ( $\mu\text{M}$ ) | - | - | - | 2 | 5 | - | - | - | - | - | 2 | 5 | - | - |
|          | Simva ( $\mu\text{M}$ ) | - | - | - | - | - | 2 | 5 | - | - | - | - | - | 2 | 5 |

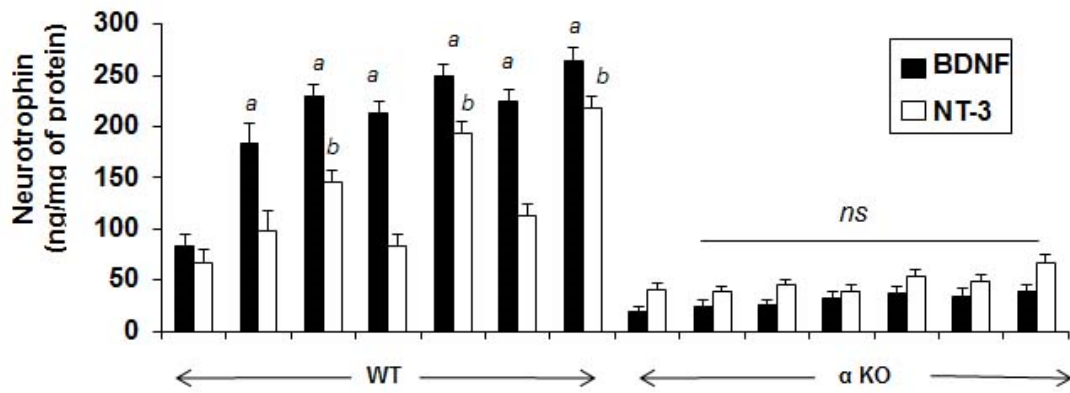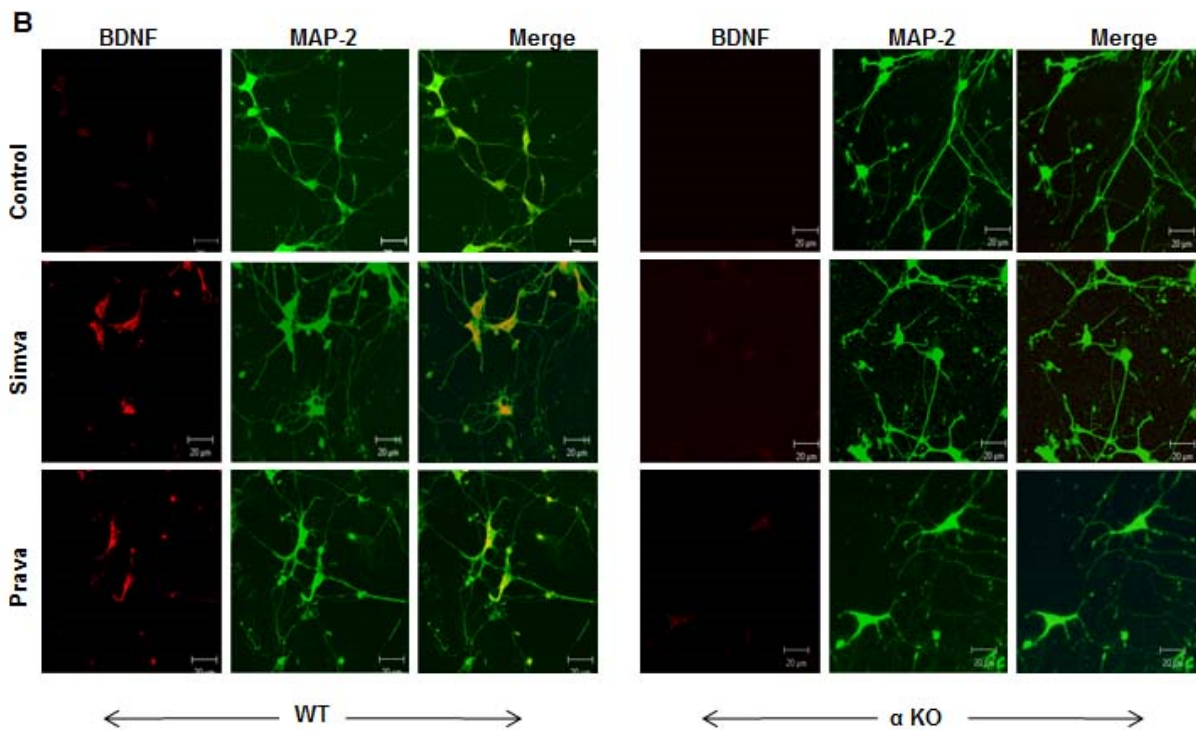

Figure S2 (part B)

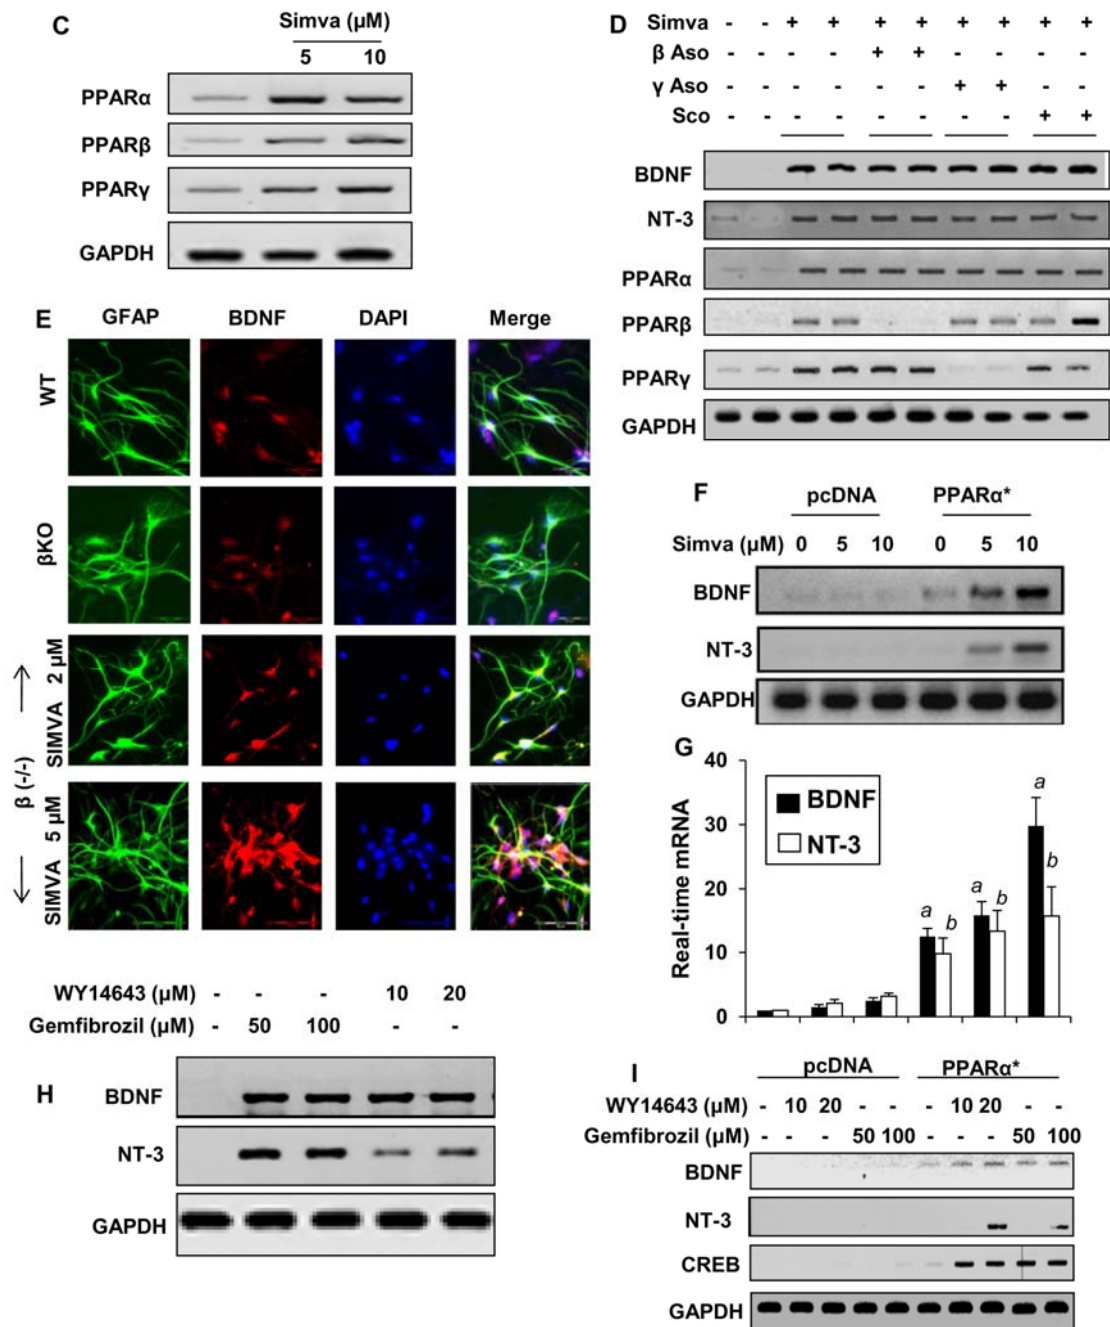

**Figure S2, related to Figure 2. Role of PPARs in statin-mediated increase in neurotrophic factors in primary mouse neurons and astrocytes.** (A) Mouse cortical neurons isolated from WT and *Ppara* null fetus (E18) were stimulated with different doses of mevastatin, pravastatin and simvastatin under serum free condition. After 24 h of stimulation, levels of BDNF and NT-3 proteins were analyzed in supernatants by ELISA. Data are mean  $\pm$  SD of three independent experiments. <sup>a</sup> $p < 0.001$  vs control BDNF; <sup>b</sup> $p < 0.001$  vs control NT-3. NS, not significant vs KO control. (B) WT and *Ppara* null neurons were stimulated with 5  $\mu$ M simvastatin or pravastatin under serum free condition. After 24 h, cells were double-labeled for BDNF and MAP-2. Results represent three independent experiments. (C) Mouse primary astrocytes were treated with different doses of simvastatin for 5 h followed by analysis of PPAR $\alpha$ ,  $\beta$  and  $\gamma$  mRNAs by RT-PCR. (D) Mouse astrocytes were incubated with PPAR $\beta$  and  $\gamma$  antisense oligoneucleotides (AsO) for 24 h. After that, cells were incubated with 10  $\mu$ M of simvastatin for 5 h followed by mRNA analysis of BDNF, NT3, PPAR $\alpha$ , PPAR $\beta$ , and PPAR $\gamma$  by semi-quantitative RT-PCR. Scrambled oligoneucleotide (ScO) were used as a negative control in this experiment. (E) Astrocytes isolated from *Pparb* null mice were stimulated with simvastatin under serum-free condition for 24 h followed by double-label immunofluorescence for GFAP and BDNF. *Ppara* null astrocytes were transfected with pcDNA3 (an empty vector) or *Ppara* over-expression construct. After 24 h, cells were stimulated with different doses of simvastatin for 5 h followed by mRNA analysis of BDNF and NT-3 by RT-PCR (F) and real-time PCR (G). Data are mean  $\pm$  SD of three independent experiments. <sup>a</sup> $p < 0.001$  vs control-pcDNA-BDNF; <sup>b</sup> $p < 0.001$  vs control-pcDNA-NT-3. (H) Cells were treated with different concentrations of WY14643 and gemfibrozil for 5 h followed by mRNA analysis of BDNF and NT3 by semi-quantitative RT-PCR. (I) *Ppara* null astrocytes were transfected with pcDNA3 or *Ppara* over-expression construct. After 24 h, cells were stimulated with different doses of WY14643 and gemfibrozil for 5 h followed by mRNA analysis of CREB, BDNF and NT-3 by RT-PCR. Results represent three independent experiments.

Figure S3

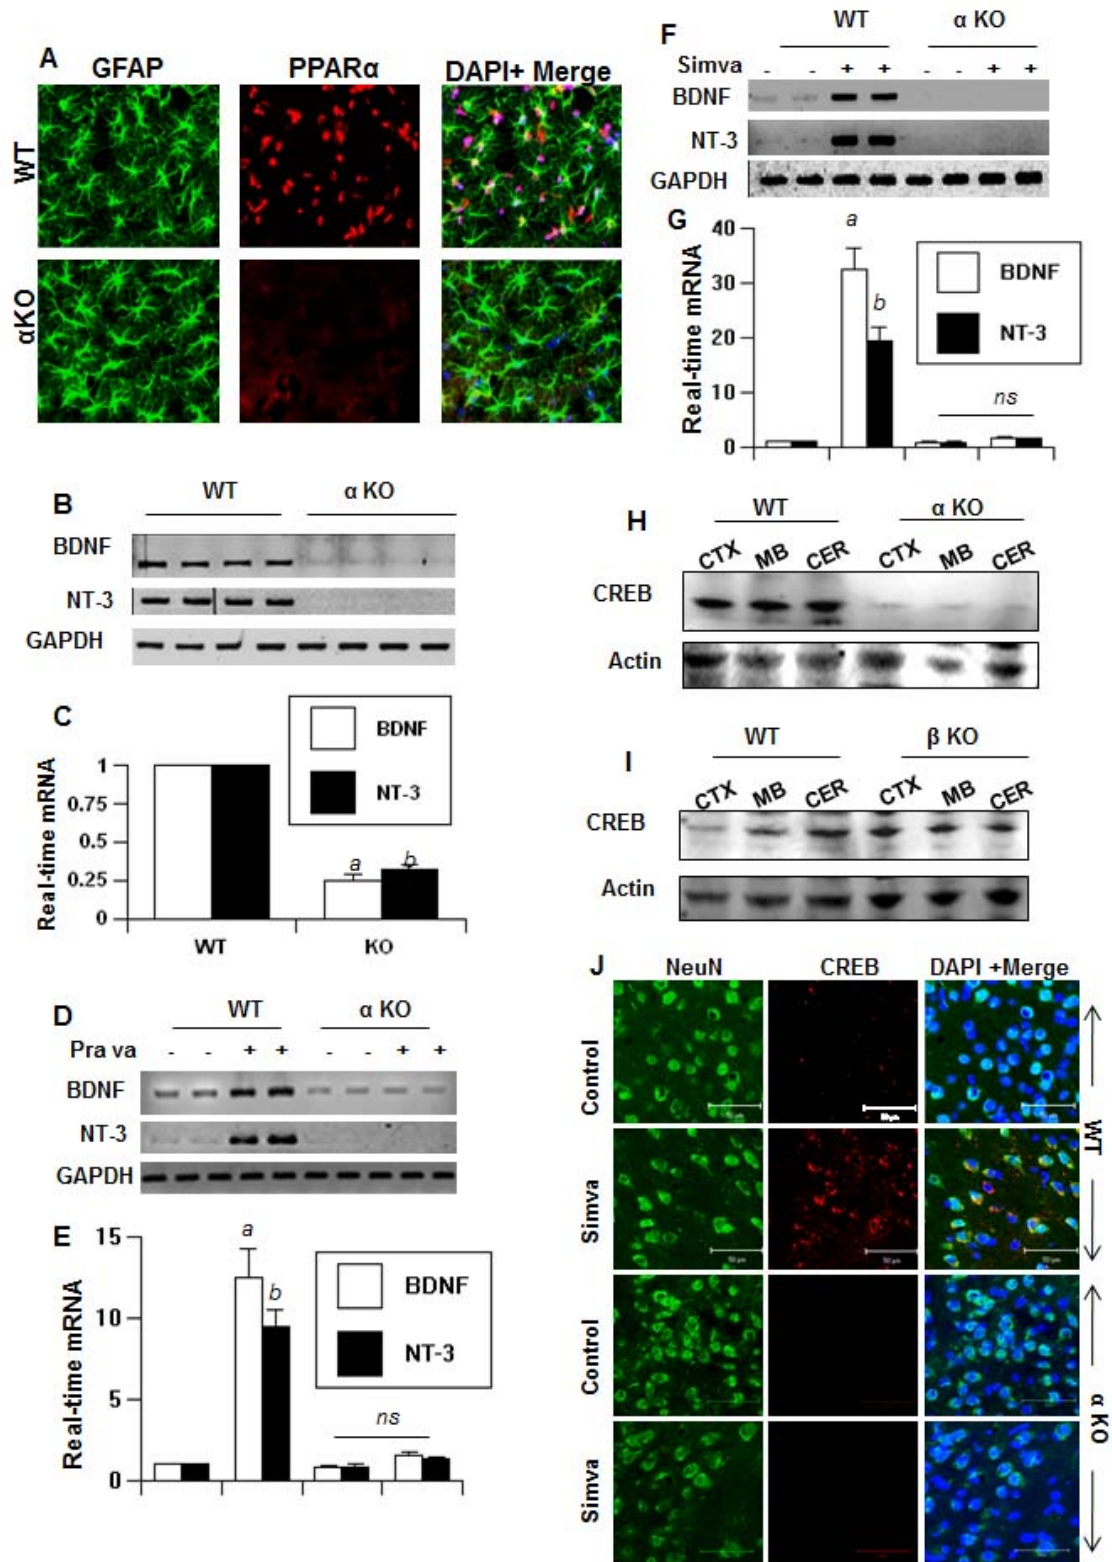

**Figure S3, related to Figure 2 and Figure 5. Statins stimulate the expression of neurotrophins and CREB *in vivo* in the CNS via PPAR $\alpha$ .** (A) Cortical sections of WT and *Ppara*-null ( $\alpha$  KO) mice were double-labeled with GFAP and PPAR $\alpha$ . DAPI was used to visualize nucleus. Results represent analysis of two sections of each of 4 mice per group. Cortices of six to eight week old male WT ( $n = 4$ ) and  $\alpha$  KO mice ( $n = 4$ ) were analyzed for the mRNA expression of BDNF and NT3 by semi-quantitative RT-PCR (B) and quantitative real-time PCR (C). Data are mean  $\pm$  SEM of four mice ( $n=4$ ) per group. <sup>a</sup> $p < 0.001$  vs control BDNF; <sup>b</sup> $p < 0.001$  vs control NT-3. Hippocampal sections of WT and  $\alpha$  KO mice were immunostained with BDNF using DAB-staining protocol. WT and  $\alpha$  KO mice ( $n=4$  in each group) were fed pravastatin (1 mg/kg bwt/d) (D, E) and simvastatin (1mg/kg bwt/d) (F, G) for one week followed by analysis of BDNF and NT-3 mRNAs in the cortex by semi-quantitative RT-PCR (D & F) and real-time PCR (E & G). Control mice received vehicle (0.1% methyl cellulose) only. Data are mean  $\pm$  SEM of four mice per group. <sup>a</sup> $p < 0.001$  vs vehicle-control-BDNF; <sup>b</sup> $p < 0.001$  vs vehicle-control-NT-3. (H) Cortex (CTX), midbrain (MB), and cerebellum (CER) of WT and  $\alpha$  KO mice were immunoblotted for CREB. (I) CREB immunoblot analysis in the different parts of the brain of WT and *Pparb*-null ( $\beta$  KO) mice. (J) Wild type and  $\alpha$  KO mice ( $n=4$  per group) were treated with simvastatin (1mg/kg bwt/d) via gavage for 7 d. After that, animals were sacrificed and their cortical sections were double-labeled for NeuN (green) and CREB (red). Results represent analysis of two sections of each of 4 mice per group.

**Figure S4 (part A)**

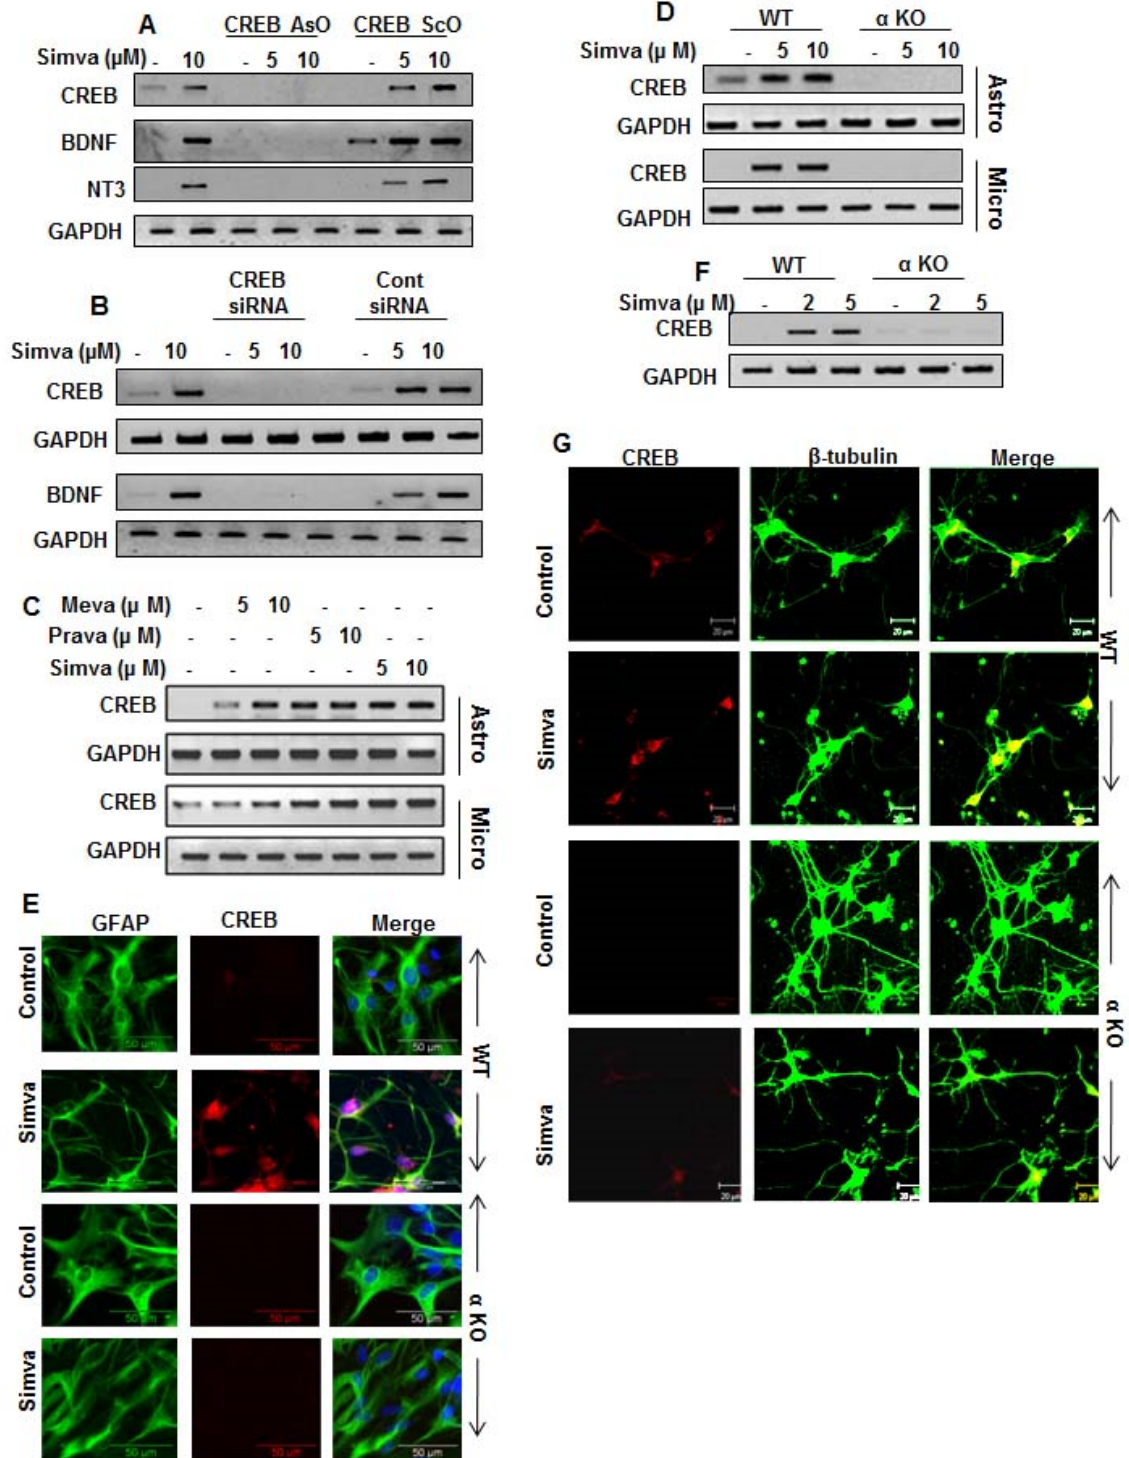



Figure S4 (part B)

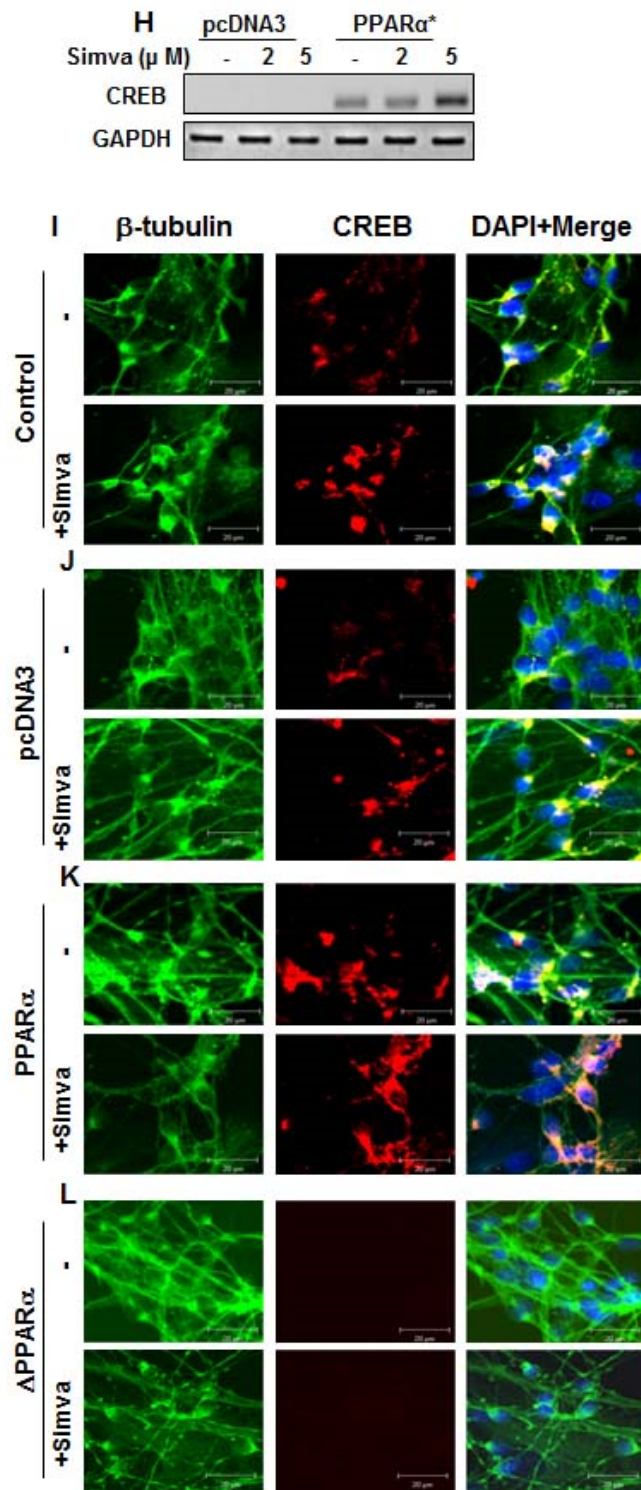

**Figure S4, related to Figure 5. Statins stimulate the expression of BDNF and NT-3 in glial cells and neurons via PPAR $\alpha$ -dependent transcriptional regulation of CREB.**

(A) Primary mouse astrocytes were incubated with CREB antisense (AsO) and scrambled (ScO) oligonucleotides. After 24 h, cells were treated with simvastatin for 6 h followed by monitoring the mRNA expression of CREB, BDNF and NT-3. (B) Mouse cortical neurons were transfected with CREB siRNA and control siRNA. After 24 h of transfection, cells were treated with simvastatin for 6 h followed by analysis of BDNF and CREB mRNAs by RT-PCR. (C) Primary mouse astrocytes (*top*) and microglia (*bottom*) were treated with three different statins under serum free condition for 6 h followed by monitoring the mRNA expression of CREB by RT-PCR. (D) Astrocytes (*top*) and microglia (*bottom*) isolated from WT and *Ppara*-null mice were treated with simvastatin for 6 h followed by mRNA analysis of CREB by RT-PCR. (E) Astrocytes isolated from WT and *Ppara*-null mice were treated with simvastatin for 24 h followed by double-labeling of GFAP and CREB. (F) Cortical neurons isolated from WT and *Ppara*-null mice were treated with simvastatin for 6 h followed by monitoring the mRNA expression of CREB by RT-PCR. (G) After 24 h of stimulation, neurons were double-labeled for CREB and  $\beta$ -tubulin. Results represent three independent analyses. (H) *Ppara*-null astrocytes were transfected with *Ppara* over-expression construct. After 24 h of transfection, cells were treated with simvastatin under serum free condition for 6 h followed by monitoring the mRNA analysis of CREB by RT-PCR. (I-L) Human fetal neurons were isolated, cultured and transfected with *Ppara* over-expression construct, dominant negative construct ( $\Delta$ PPAR $\alpha$ ) and empty vector (pcDNA3). After 24 h of transfection, cells were treated with simvastatin for 6 h followed by double-labeling of CREB and  $\beta$ -tubulin (I, Control; J, pcDNA3; K, PPAR $\alpha$ ; L,  $\Delta$ PPAR $\alpha$ ). Results represent three independent experiments.

## Supplementary Methods

### Lentiviral cloning of FL*Ppara* and L331M/Y334D $\Delta$ sb*Ppara*:

Site directed mutation: Mouse PPAR $\alpha$  ORF cloned in pCMV6-AC-GFP vector (cat # MG 227641) was purchased from Origene. MG227641 was mutated at Leu331 with methionine (L331M) and Tyr334 with aspartate (Y334D) by site-directed mutagenesis kit (Stratagene). Two primers in opposite orientation were used to amplify the mutated plasmid in a single PCR reaction. The PCR product was precipitated with ethanol and then phosphorylated by T4 kinase. The phosphorylated fragment was self-ligated by T4 DNA ligase and digested with restriction enzyme DpnI to eliminate the non-mutated template. The mutated plasmid was cloned and amplified in Escherichia coli (DH5 $\alpha$  strain) competent cells.

### Generating pLenti6.3/V5-TOPO® constructs of FL*Ppara* and $\Delta$ sb*Ppara*

Briefly, each construct was amplified by PCR, using primer pair (sequence) and every product had a single adenosine (A) to the 3' end. Then the TOPO cloning reaction was performed using Invitrogen kit (K5315-20) with pLenti6.3/V5-TOPO vector. For

transformation One-Shot Stbl3 competent cells were used. Sequencing of the clones was performed at ACGT Inc.

#### Producing Lentivirus in 293FT Cells

293FT cells were cultured with 95% confluency in Opti-MEM media without antibiotics. Next day, ViraPower™ Packaging Mix (9 µg/reaction) and pLenti expression plasmid DNA containing either FL*Ppara* or  $\Delta$ sb*dPpara* (3 µg/reaction) (12 µg total) were mixed in 1.5 mL of serum-free Opti-MEM® I Medium. In another tube, 36 µL of Lipofectamine® 2000 was added in 1.5 mL of serum-free Opti-MEM® I Medium with gentle mix. After 5 min of incubation at room temperature, both the reactions were combined and incubated for 20 mins. After that, the mixture was applied to HEK-293FT cells and incubated overnight at 37°C in a humidified 5% CO<sub>2</sub> incubator. Next day, the media would be replaced with serum-free Opti-MEM media and further incubated for 48-72 hrs at 37°C in a humidified 5% CO<sub>2</sub> incubator and then sup containing viral particles was collected. Viral particles were concentrated with lenti-concentrator solution and MOI was calculated.

**Breeding and development of FAD5X/*Ppara*-null animals.** Female 5XFAD mice overexpressing human amyloid precursor protein (APP) with Swedish (K670N, M671L), Florida (I716V), and London (V717I) Familial Alzheimer's Disease (FAD) mutations along with human Presenilin 1 (PS1) harboring two FAD mutations, M146L and L286V, were crossed to male mice null for PPAR $\alpha$  (The Jackson Laboratory, #008154). Through a series of four inbred generations, three double-transgenic lines possessing mutated APP and PSEN1 on a PPAR $\alpha$  null background were produced. Bigenic male mice maintained transgenic for the 5XFAD mutations and homozygous for the PPAR $\alpha$  depletion [FAD5X/*Ppara*-null] were used for experimentation. Animal experiments were conducted in accordance with institutional approval and National Institutes of Health guidelines.

#### **Electrospray ionization (ESI)-MS analysis of PPAR $\alpha$ -simvastatin interaction**

Primary mouse astrocytes were treated with simvastatin (10 µM) for 2 h under serum free condition followed by washing of cells four times with sterile PBS to remove any unbound simvastatin. Then cells were homogenized in ice-cold nondetergent hypotonic buffer [10 mM HEPES (pH 7.9), 1.5 mM MgCl<sub>2</sub>, 10 mM KCl, 100 mM DTT, protease and phosphatase inhibitor cocktail]. After 10 min of additional incubation in the hypotonic buffer, the homogenate was centrifuged at 8,000 g at 4°C for 10 min. Next, the pellet was homogenized in ice-cold extraction buffer [10 mM HEPES (pH 7.9), 1.5 mM MgCl<sub>2</sub>, 0.21 M NaCl, 0.2 mM EDTA, 25% (v/v) glycerol, 100 mM DTT, protease and phosphatase inhibitor cocktail], placed on a rotating shaker at 4°C for 1 h, and then centrifuged at 18,000 g for 10 min. The supernatant (nuclear fraction) was incubated with 1.5 µg of GST PPAR $\alpha$  LBD (Protein One) at 4°C for 6 h in a rotating shaker. The reaction mixture was passed through glutathione column (Pierce® GST Spin Purification Kit), washed four times [50 mM Tris HCl (pH 7.4), 100 mM NaCl, protease and phosphatase inhibitor cocktail] and then eluted with free glutathione. The eluate was transferred to methanol:chloroform:water (4:3:1) mixture and then centrifuged at 14,000 rpm for 90 sec. The organic phase was collected, evaporated in the speedvac, reconstituted with 30 µL chloroform, and analyzed by ESI-MS.

## **In Silico structural analyses of PPAR $\alpha$ , $\beta$ , and $\gamma$ complexed with simvastatin.**

### *Ligand Preparation*

The ligand simvastatin was subjected to LigPrep module implemented in Tripos software<sup>X1</sup>, which converted the 2D to 3D structure. Then using the ionization engine, the ligand was prepared at pH  $7.0 \pm 1$ . The appropriate stereoisomers were generated along with the low energetic conformers.

### *Protein Preparation*

The crystal structures for PPAR $\alpha$  (3VI8.pdb),  $\beta$  (3GWX.pdb), and  $\gamma$  (3U9Q.pdb) were imported from the pdb databank. The protein preparation module of Tripos was utilized to fix up the hydrogen bonding orientation, bond orders, charges, missing side chain atoms, missing loop, protonation at physiological pH, and side chain bumps. Finally, staged minimization was performed for all three protein structures.

### *Docking of the Ligands*

The Surflex docking module<sup>X1</sup> implemented in Tripos was used to carry out the docking of simvastatin in PPAR $\alpha$ ,  $\beta$  and  $\gamma$  crystal structures. After the docking, three major scoring functions such as Total Score (a function of  $-\text{Log}K_d$ ), Crash Score (penalty score reflecting the inappropriate penetration of the ligand into the active site pocket) and Polar Score (depicting all the favorable polar interactions) were obtained.

We also computed the binding free energy of simvastatin in PPAR $\alpha$ , using Molecular Mechanics Generalized Born Surface Area approach<sup>X</sup>. To account for the structural deformation upon binding, we included adaptation expense that accounts for changes in the intramolecular energetics ( $\Delta G_{\text{int}}^0$ ). For ligand strain energy, we specified a 5 Å region of the receptor from the centroid of the ligand to be flexible so that the protein structure was relaxed in the computation of the binding energy of the ligands.
